# Supplementary material for: Discovery proteomics defines androgen-regulated glycoprotein networks in prostate cancer cells, as well as putative biomarkers of prostatic diseases
Source: PubMed Central journal article supplement (PMC8592995; doi:10.1038/s41598-021-01554-2), 2021-11-15
Supplement: 41598_2021_1554_MOESM1_ESM.pdf [file 41598_2021_1554_MOESM1_ESM.pdf]

## Supplementary Figures and Tables

| Table of Contents .....                                                                                                                | Page # |
|----------------------------------------------------------------------------------------------------------------------------------------|--------|
| <b>Supplementary Figure 1A-1B...</b> Androgen-mediated proliferation is dose-dependent in LNCaP prostate-tumor cells                   | 2      |
| <b>Supplementary Figure 2...</b> Full western blot panels                                                                              | 3      |
| <b>Supplementary Figure 3...</b> Network visualization of enriched pathways in androgen-responsive glycoproteins in LNCaP cells.....   | 4      |
| <b>Supplementary Figure 4...</b> Theoretical androgen-regulated glycoprotein clusters.....                                             | 5      |
| <b>Supplementary Figure 5...</b> K-means androgen-regulated glycoprotein clusters.....                                                 | 6      |
| <b>Supplementary Figure 6...</b> Androgen-regulated glycoprotein clusters associated with proliferation-inhibition in LNCaP cells..... | 7      |
| <b>Supplementary Figure 7...</b> Light photomicrographs of hematoxylin and eosin-stained tissue samples.....                           | 8-11   |
| <b>Supplementary Figure 8</b> Silver-stained gels of detergent-extracted proteins from tissue samples..                                | 12     |
| <b>Supplementary Figure 9...</b> Silver-stained gels of extracted glycoproteins from tissue samples after lectin chromatography.....   | 13     |
| <b>Supplementary Figure 10...</b> Protein identifications in clinical samples                                                          | 14     |
| <b>Supplementary Figure 11...</b> QPCR analyses of KLK3, GAPDH, and ENTPD5 in LNCaP cells                                              | 15     |
| <b>Supplementary Figure 12...</b> Evaluation of transcription factor binding sites in <i>ENTPD5</i> introns #2 and #5.....             | 16     |
| <b>Supplementary Figure 13...</b> Steps for clustering glycoproteins in LNCaP cells and tissue samples.....                            | 17-23  |
| <b>Supplemental Figure Legends</b> .....                                                                                               | 24-27  |
| <b>Supplementary Table I...</b> Mass spectrometry statistics.....                                                                      | 28     |
| <b>Supplementary Table II...</b> Clinical features of tissue samples.....                                                              | 29     |
| <b>Supplementary Table III...</b> Clinical features of tissue samples.....                                                             | 30     |
| <b>Supplementary Table IV</b> Protein quantification of Normal Adjacent Tissue & Benign Prostate Hyperplasia.....                      | 31-32  |

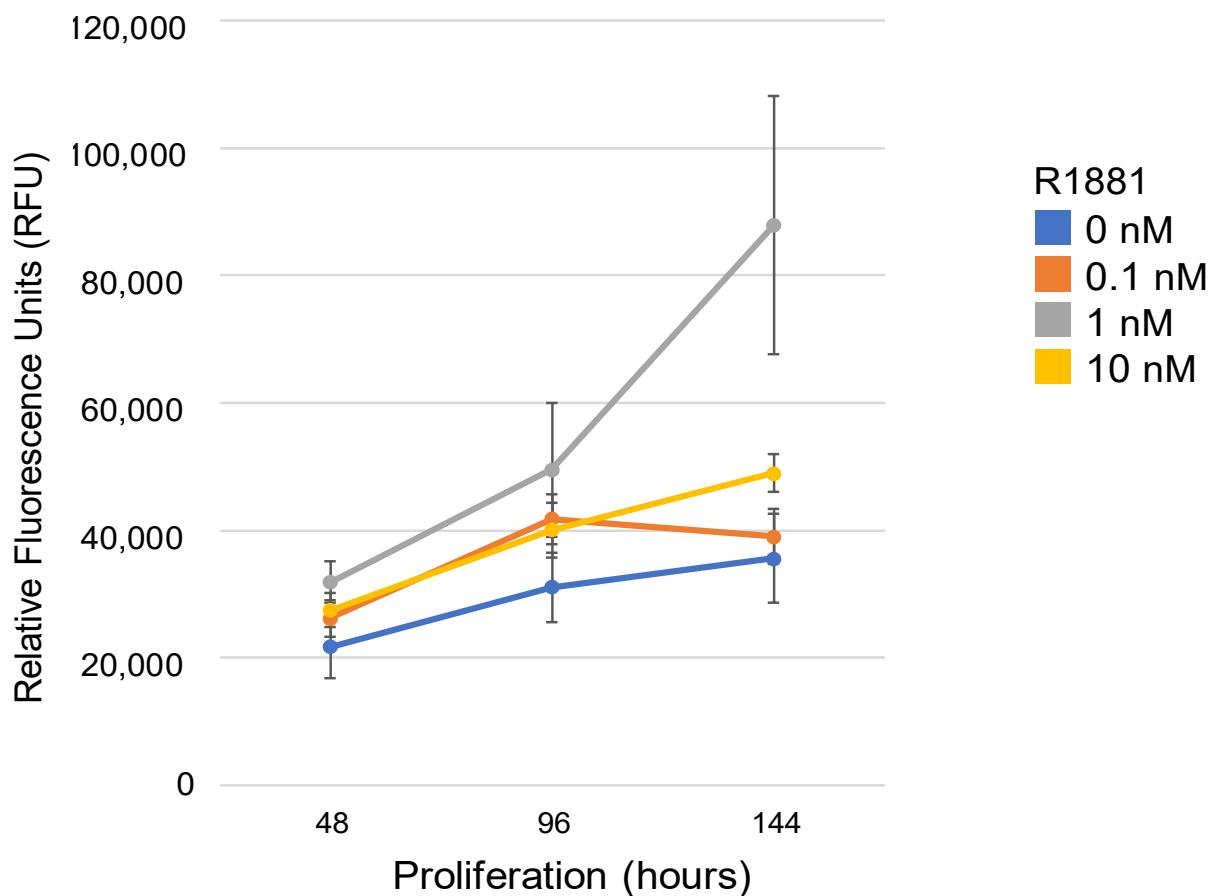

**Supplemental Figure 1A. Androgen-mediated proliferation is dose-dependent in LNCaP prostate-tumor cells.** LNCaP cells were seeded into a 96-well tissue culture plate containing androgen-depleted (AD) growth media (*i.e.*, phenol-red deficient RPMI1640 containing 10% charcoal-stripped serum) for 24hrs and challenged with vehicle (*i.e.*, EtOH; 0 nM R1881) and different concentrations of synthetic androgen R1881 (*i.e.*, 0.1, 1, or 10 nM). The relative fluorescence unit (RFU) of vehicle- and androgen-treated LNCaP cells was determined at 48 hrs (*i.e.*, day 2), 96 hrs (*i.e.*, day 4), and 144 hrs (*i.e.*, day 6) after the initial 24 hr seeding in AD growth medium with the CyQUANT Cell Proliferation Assay Kit. The RFU values for each experimental condition (12 wells per condition, *i.e.* 12 technical replicates) were graphed at 48, 96, and 144 hrs. The colored lines (*i.e.*, blue - 0 nM, orange - 0.1 nM, gray - 1 nM, and yellow - 10 nM) connect the mean values and standard deviation for each condition at 48, 96, and 144 hrs. The means were derived from twelve biological replicate wells per condition of a single biological experiment.

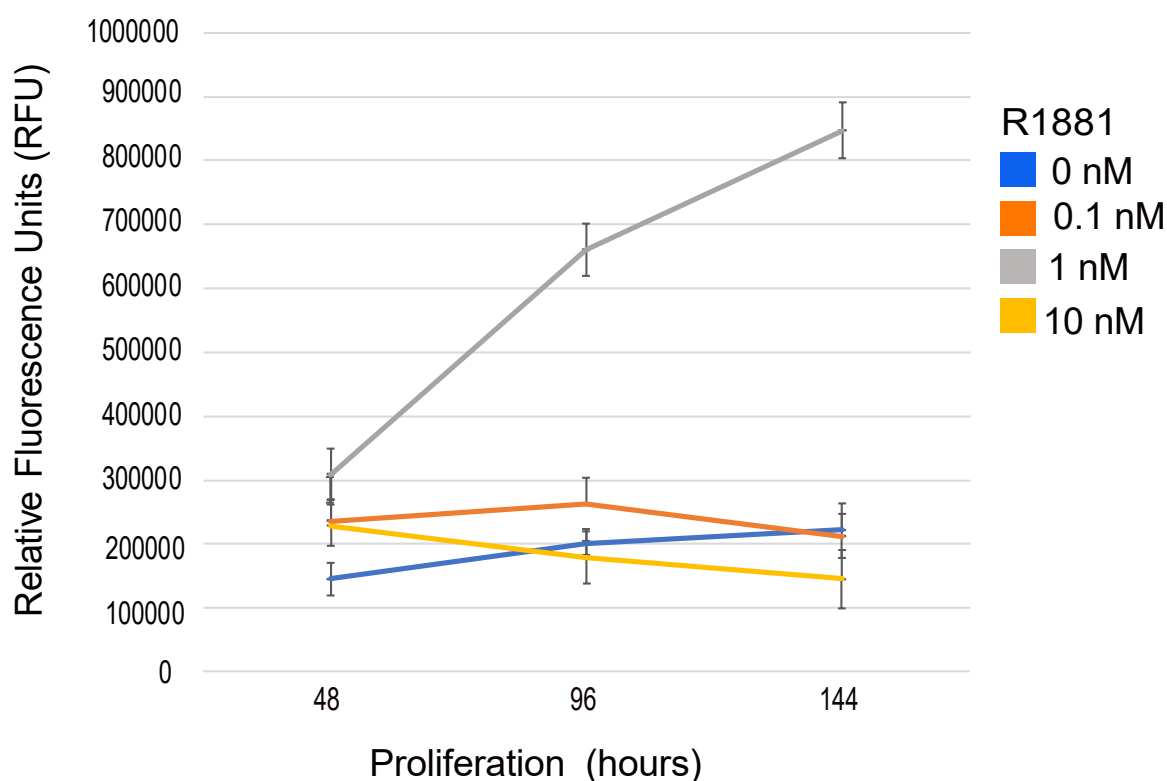

**Supplemental Figure 1B. Androgen-mediated proliferation is dose-dependent in LNCaP prostate-tumor cells.** LNCaP cells were seeded into a 96-well tissue culture plate containing androgen-depleted (AD) growth media (*i.e.*, phenol-red deficient RPMI1640 containing 10% charcoal-stripped serum) for 24hrs and challenged with vehicle (*i.e.*, EtOH; 0 nM R1881) and different concentrations of synthetic androgen R1881 (*i.e.*, 0.1, 1, or 10 nM). The relative fluorescence unit (RFU) of vehicle- and androgen-treated LNCaP cells was determined at 48 hrs (*i.e.*, day 2), 96 hrs (*i.e.*, day 4), and 144 hrs (*i.e.*, day 6) after the initial 24 hr seeding in AD growth medium with the CyQUANT Cell Proliferation Assay Kit. The RFU values for each experimental condition (12 wells per condition, *i.e.* 12 technical replicates) were graphed at 48, 96, and 144 hrs. The colored lines (*i.e.*, blue - 0 nM, orange - 0.1 nM, gray - 1 nM, and yellow - 10 nM) connect the mean values and standard deviation for each condition at 48, 96, and 144 hrs. The means were derived from twelve biological replicate wells per condition of an independent experiment.



# Figure 1 Western Blots

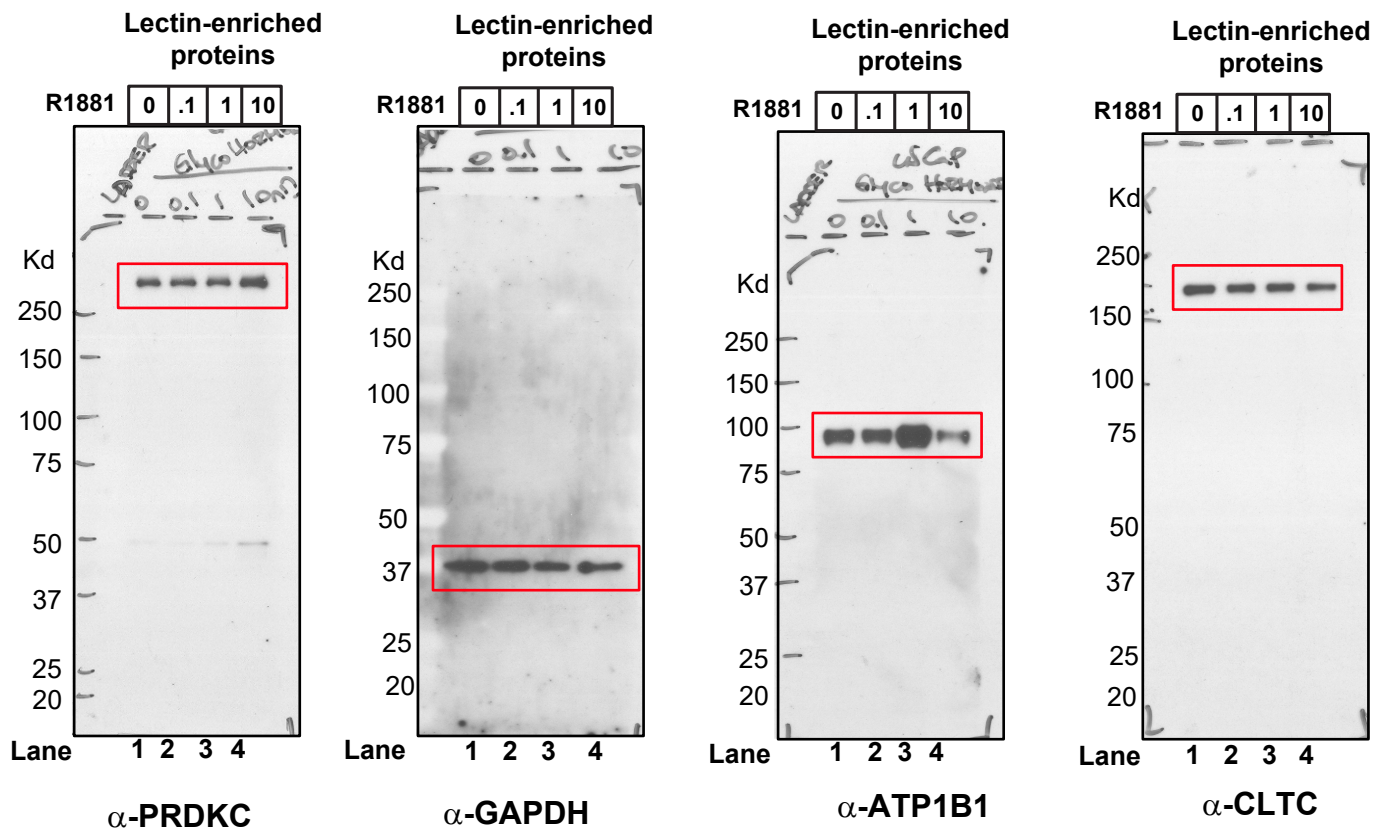

# Figure 5 Western Blots

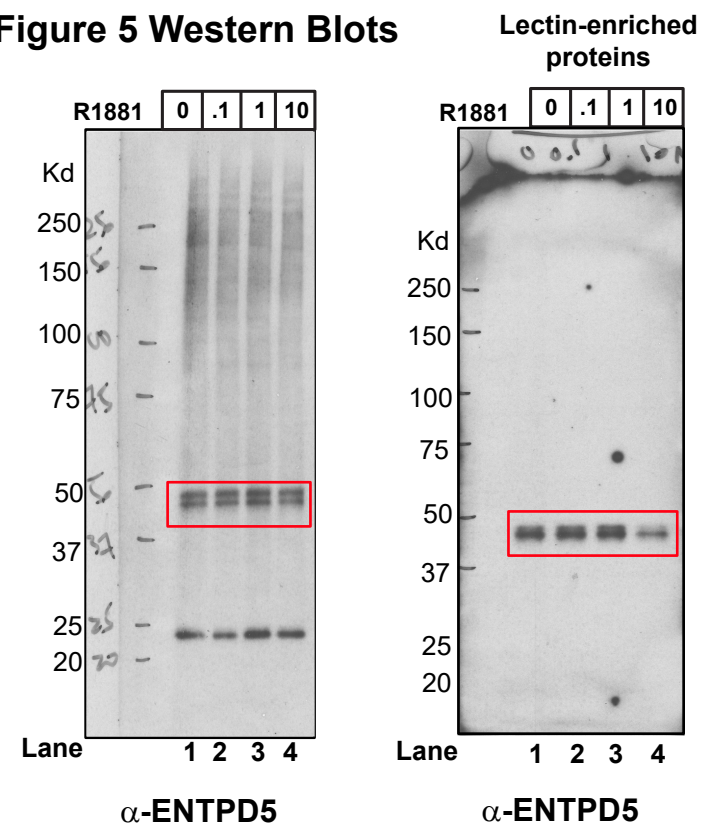





**Theoretical Clusters: 0 nM — 0.1 nM — 1.0 nM — 10.0 nM R1881**

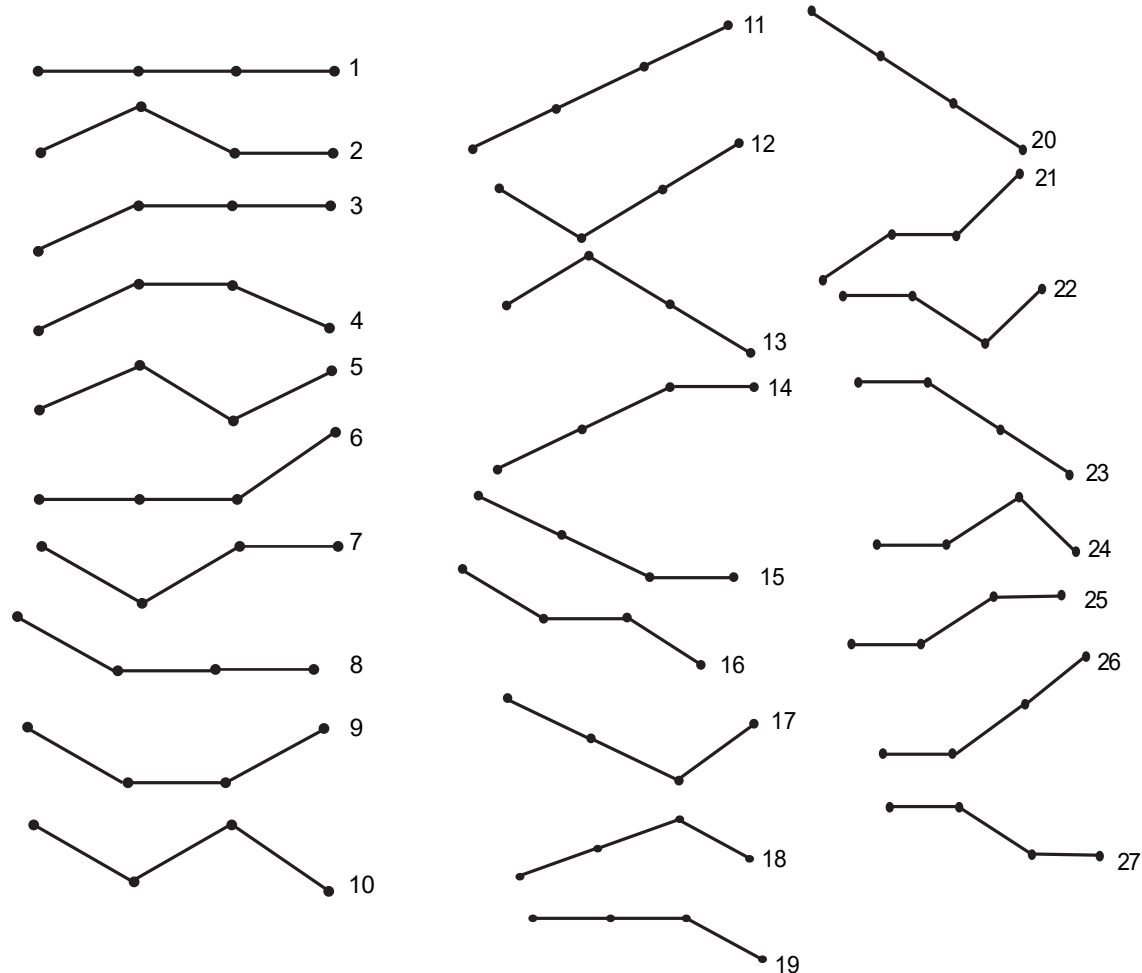

**Supplemental Fig. 4**

Relative Protein Expression

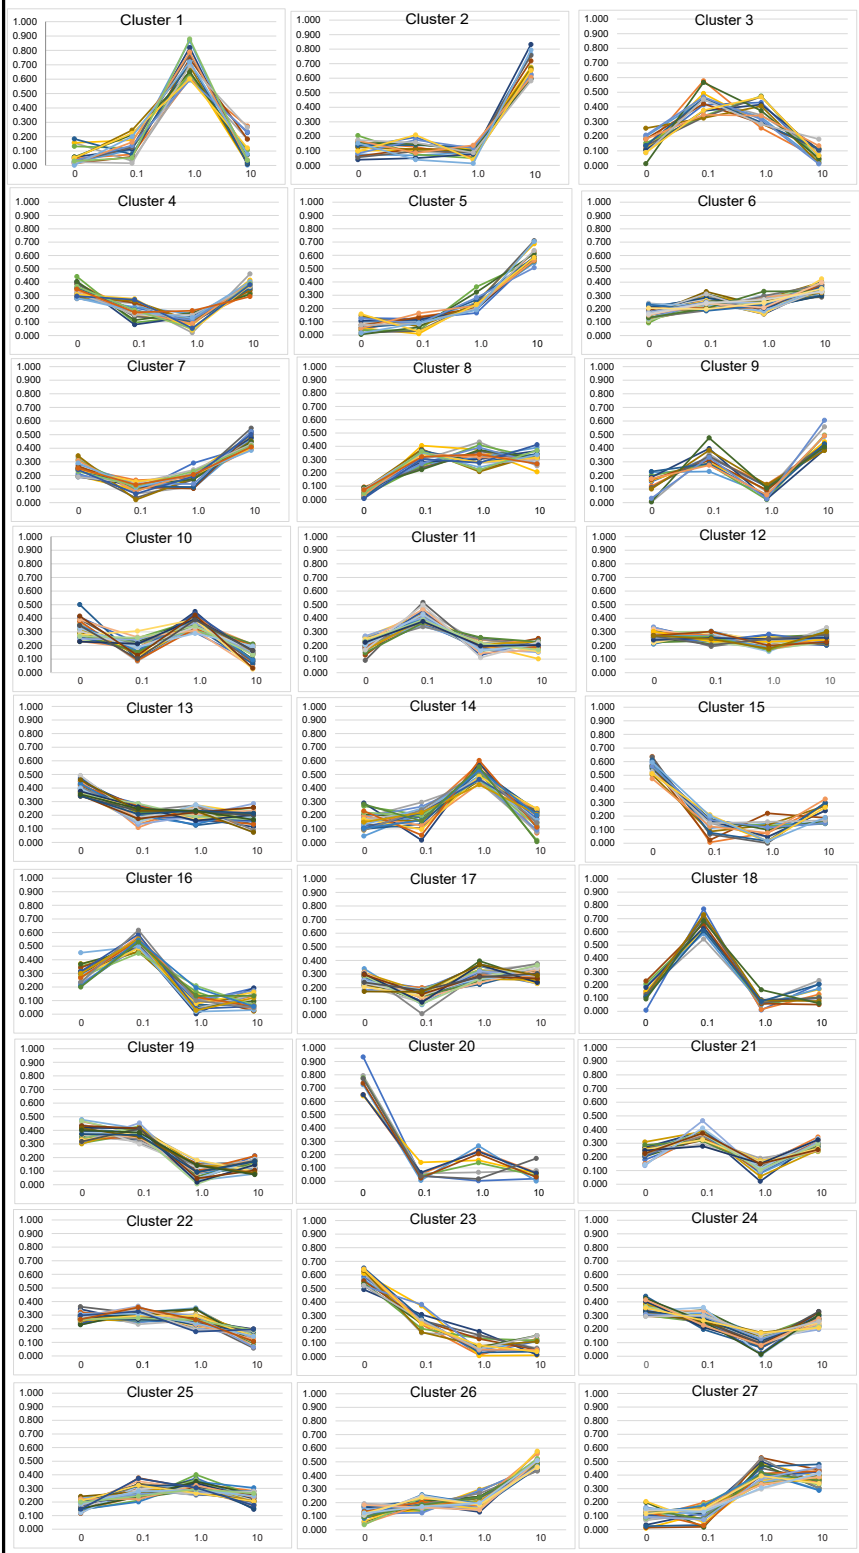

Concentration R1881 (nM)

Supplemental Fig. 5

**Theoretical Clusters: 0 nM — 0.1 nM — 1.0 nM — 10.0 nM R1881**

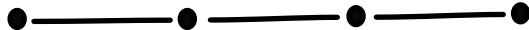

10 nM cluster concordant with 0 nM or discordant to 0.1 nM and 1.0 nM clusters

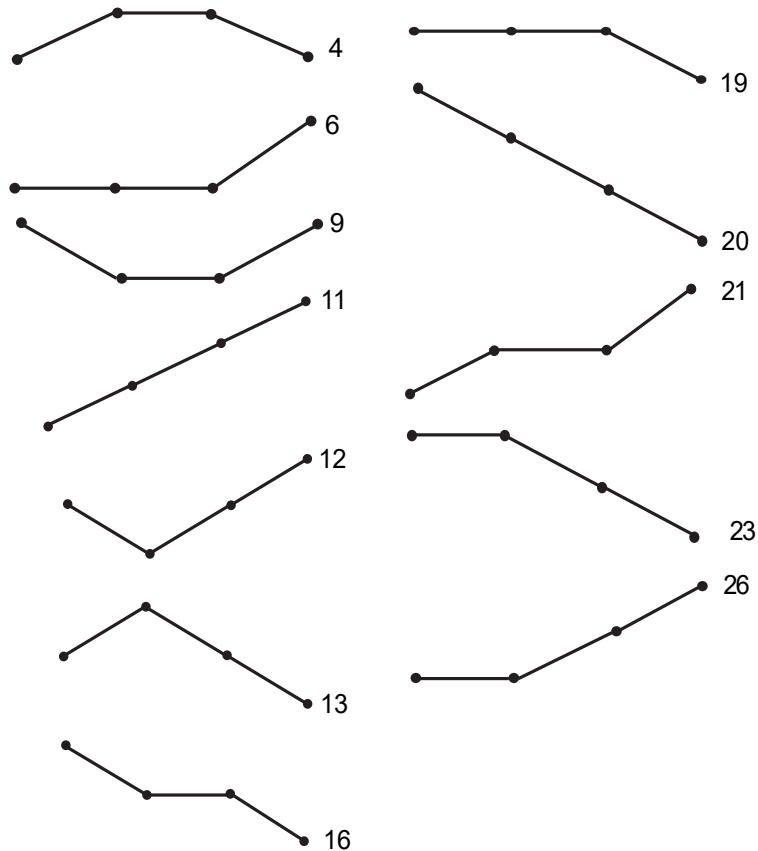

**Supplemental Fig. 6**



# Normal Adjacent tissues

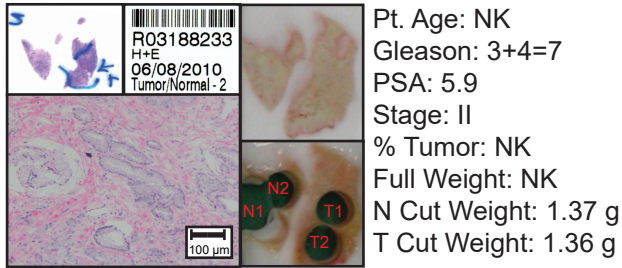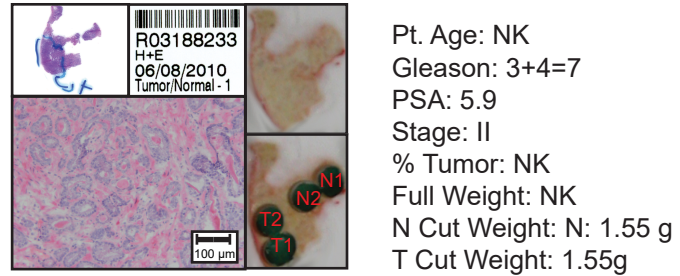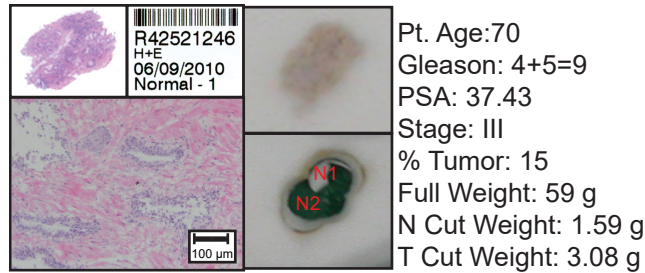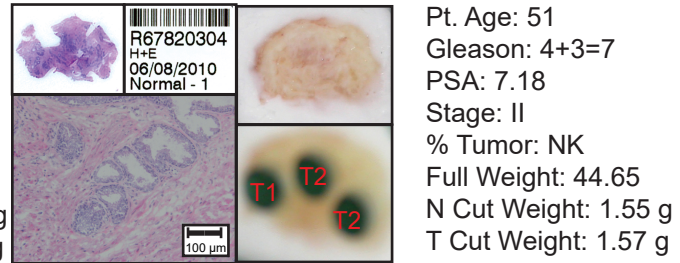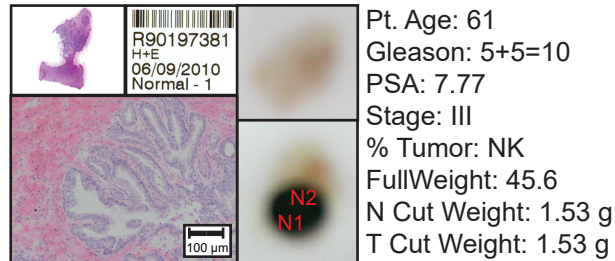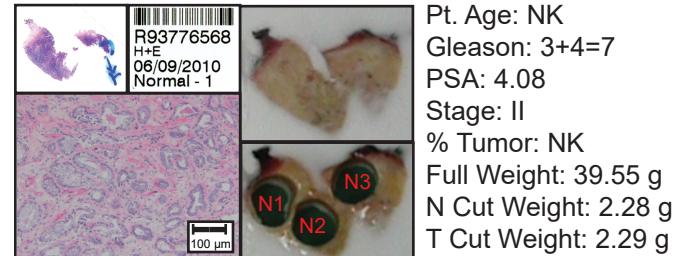

PANEL 1

Supplemental Fig. 7

# Localized disease

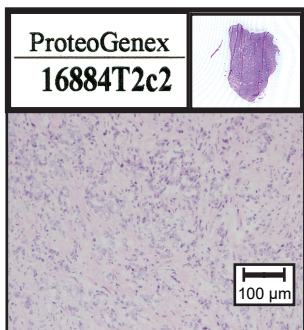

Pt. Age: 61  
Tissue Type: Tumor  
Gleason: 3+4=7  
PSA: 13.5  
Stage: II  
% Tumor: 100  
Sample Weight: 0.40 g

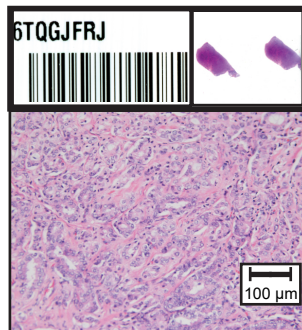

Pt. Age: 71  
Tissue Type: Tumor  
Gleason: 4+3=7  
PSA: 13  
Stage: II  
% Tumor: 80  
Sample Weight: 0.116 g

GT55Q  
Not Provided

Pt. Age: 66  
Tissue Type: Tumor  
Gleason: 6  
PSA: 5  
Stage: II  
% Tumor: 80  
Sample Weight: 0.075 g

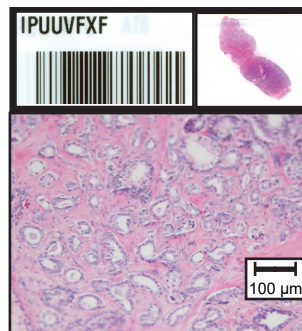

Pt. Age: 63  
Tissue Type: Tumor  
Gleason: 7  
PSA: 3  
Stage: II  
% Tumor: 55  
Sample Weight: 0.468 g

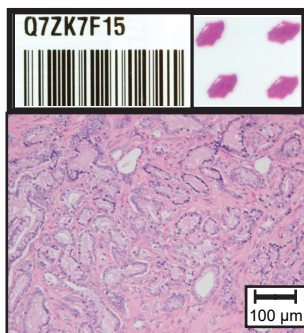

Pt. Age: 69  
Tissue Type: Tumor  
Gleason: 7  
PSA: 19  
Stage: II  
% Tumor: 80  
Sample Weight: 0.076 g

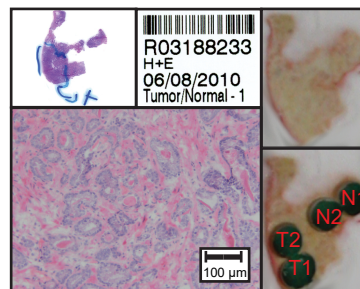

Pt. Age: NK  
Gleason: 3+4=7  
PSA: 5.9  
Stage: II  
% Tumor: NK  
Full Weight: NK  
N Cut Weight: 1.55 g  
T Cut Weight: 1.55g

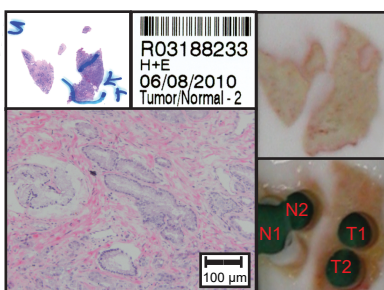

Pt. Age: NK  
Gleason: 3+4=7  
PSA: 5.9  
Stage: II  
% Tumor: NK  
Full Weight: NK  
N Cut Weight: 1.37 g  
T Cut Weight: 1.36 g

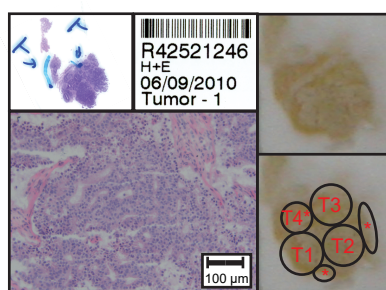

Pt. Age: 70  
Gleason: 4+5=9  
PSA: 37.43  
Stage: III  
% Tumor: 15  
Full Weight: 59 g  
N Cut Weight: 1.59 g  
T Cut Weight: 3.08 g

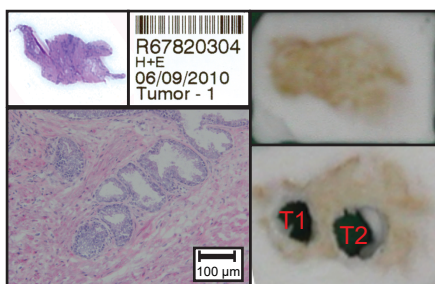

Pt. Age: 51  
Gleason: 4+3=7  
PSA: 7.18  
Stage: II  
% Tumor: NK  
Full Weight: 44.65  
N Cut Weight: 1.55 g  
T Cut Weight: 1.57 g

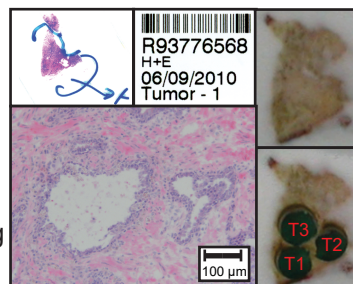

Pt. Age: NK  
Gleason: 3+4=7  
PSA: 4.08  
Stage: II  
% Tumor: NK  
Full Weight: 39.55 g  
N Cut Weight: 2.28 g  
T Cut Weight: 2.29 g



# BPH/Normal Adjacent tissues

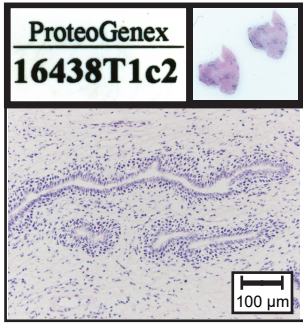

Pt Age: 66  
Tissue Type: BPH  
Sample Weight: 0.56 g

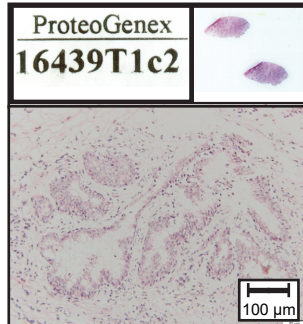

Pt Age: 60  
Tissue Type: BPH  
Sample Weight: 0.511 g

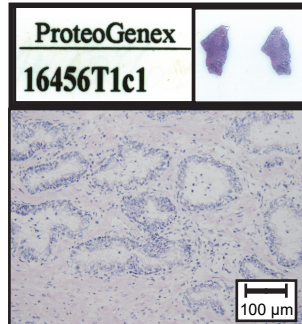

Pt Age: 61  
Tissue Type: BPH  
Sample Weight: 0.809 g

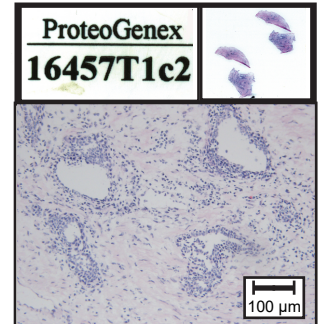

Pt Age: 67  
Tissue Type: BPH  
Sample Weight: 0.819 g

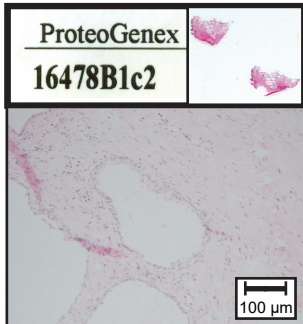

Pt Age: 61  
Tissue Type: BPH  
Sample Weight: 0.723 g

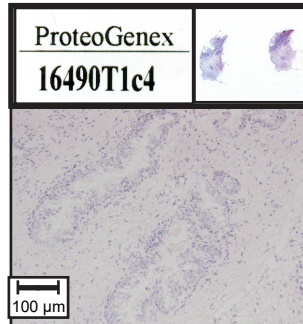

Pt Age: 60  
Tissue Type: BPH  
Sample Weight: 0.656 g

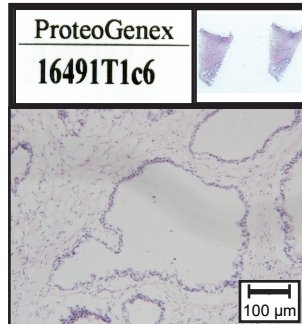

Pt Age: 60  
Tissue Type: BPH  
Sample Weight: 0.793 g

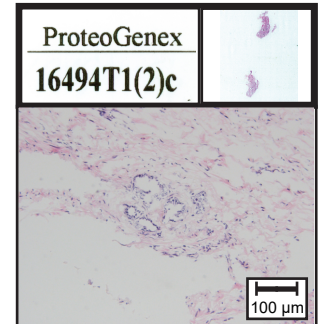

Pt Age: 65  
Tissue Type: BPH  
Sample Weight: 0.606 g

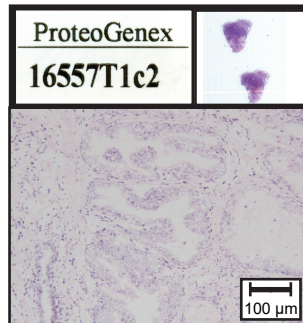

Pt Age: 60  
Tissue Type: BPH  
Sample Weight: 0.602 g

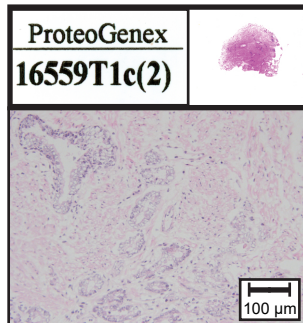

Pt Age: 66  
Tissue Type: BPH  
Sample Weight: 0.851 g

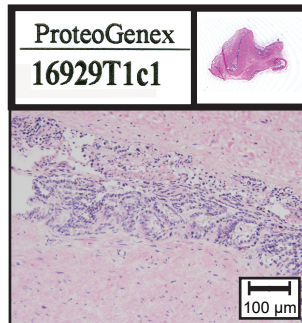

Pt. Age: 54  
Tissue Type: NAT  
Sample Weight: 0.79 g

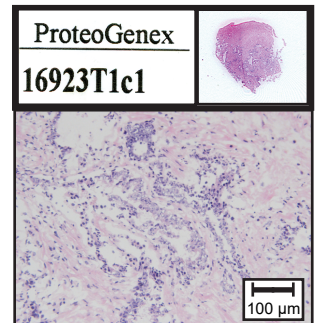

Pt. Age: 65  
Tissue Type: NAT  
Sample Weight: 0.44 g

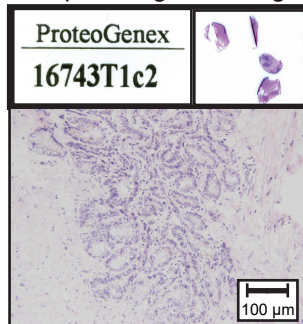

Pt. Age: 62  
Tissue Type: NAT  
Sample Weight: 0.83 g

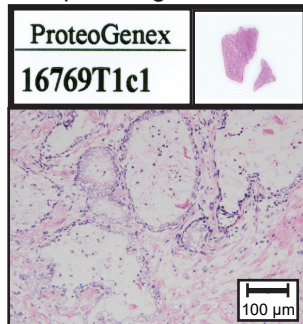

Pt. Age: 60  
Tissue Type: NAT  
Sample Weight: 0.68 g

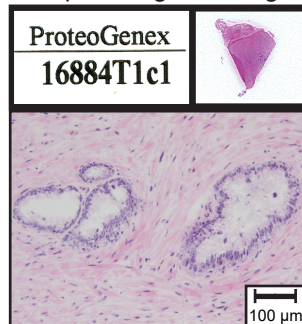

Pt. Age: 61  
Tissue Type: NAT  
Sample Weight: 0.44 g



# Localized and metastatic disease

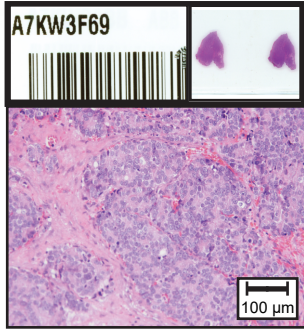

Pt. Age: 82  
Tissue Type: Tumor  
Gleason: NK  
PSA: NK  
Stage: NK  
% Tumor: 95  
Sample Weight: 0.804 g

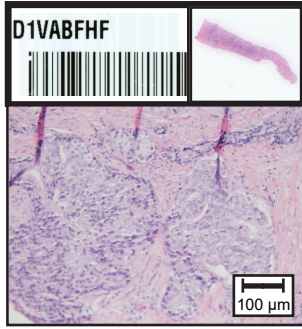

Pt. Age 62:  
Tissue Type: Tumor  
Gleason: 9  
PSA: 2  
Stage: IV  
% Tumor: 80  
Sample Weight: 0.359 g

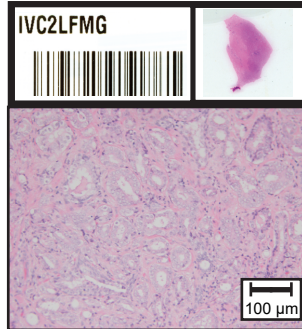

Pt. Age: 72  
Tissue Type: Tumor  
Gleason: 6  
PSA: NK  
Stage: III  
% Tumor: 65  
Sample Weight: 0.129 g

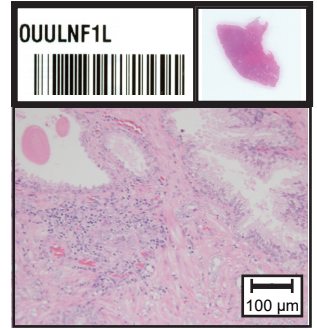

Pt. Age: 60  
Tissue Type: Tumor  
Gleason: 7  
PSA: 34  
Stage: IV  
% Tumor: 50  
Sample Weight: 0.25 g

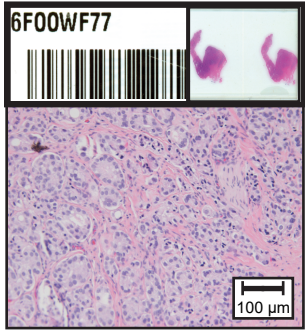

Pt. Age: 61  
Tissue Type: Tumor  
Gleason: 5+4=9  
PSA: 11  
Stage: III  
% Tumor: 55  
Sample Weight: 0.308 g

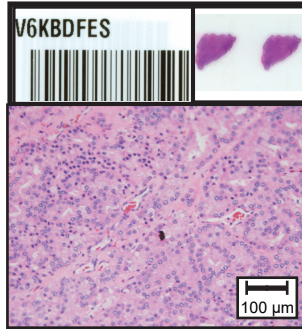

Pt. Age: 71  
Tissue Type: Tumor  
Gleason: 9  
PSA: NK  
Stage: III  
% Tumor: 90  
Sample Weight: 0.198 g

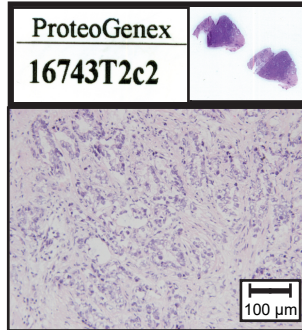

Pt. Age: 62  
Tissue Type: Tumor  
Gleason: 3+4=7  
PSA: 4.89  
Stage: III  
% Tumor: 60  
Sample Weight: 0.82 g

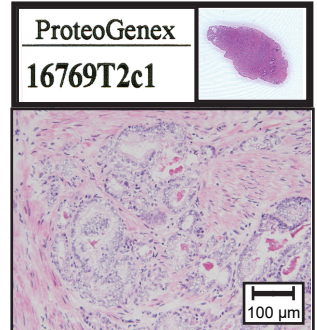

Pt. Age: 60  
Tissue Type: Tumor  
Gleason: 3+3=6  
PSA: NK  
Stage: III  
% Tumor: 70  
Sample Weight: 0.87 g

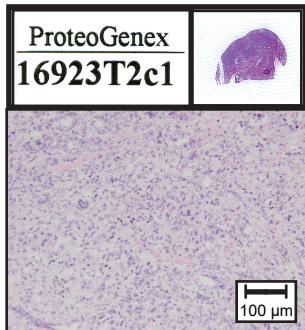

Pt. Age: 65  
Tissue Type: Tumor  
Gleason: 4+3=7  
PSA: NK  
Stage: III  
% Tumor: 100  
Sample Weight: 0.43 g

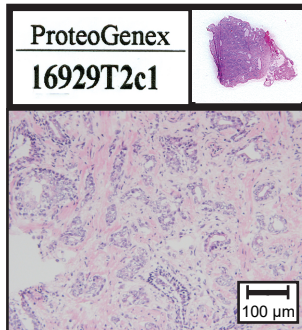

Pt. Age: 54  
Tissue Type: Tumor  
Gleason: 3+4=7  
PSA: 5.2  
Stage: III  
% Tumor: 75  
Sample Weight: 0.52 g

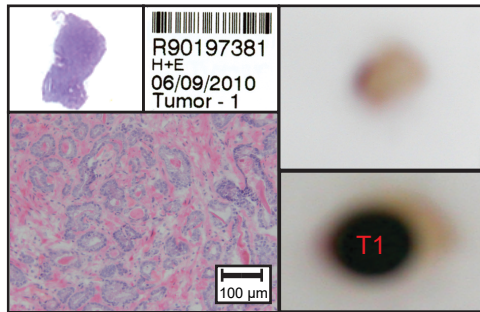

Pt. Age: 61  
Gleason: 5+5=10  
PSA: 7.77  
Stage: III  
% Tumor: NK  
FullWeight: 45.6  
N Cut Weight: 1.53 g  
T Cut Weight: 1.53 g

## PANEL 4

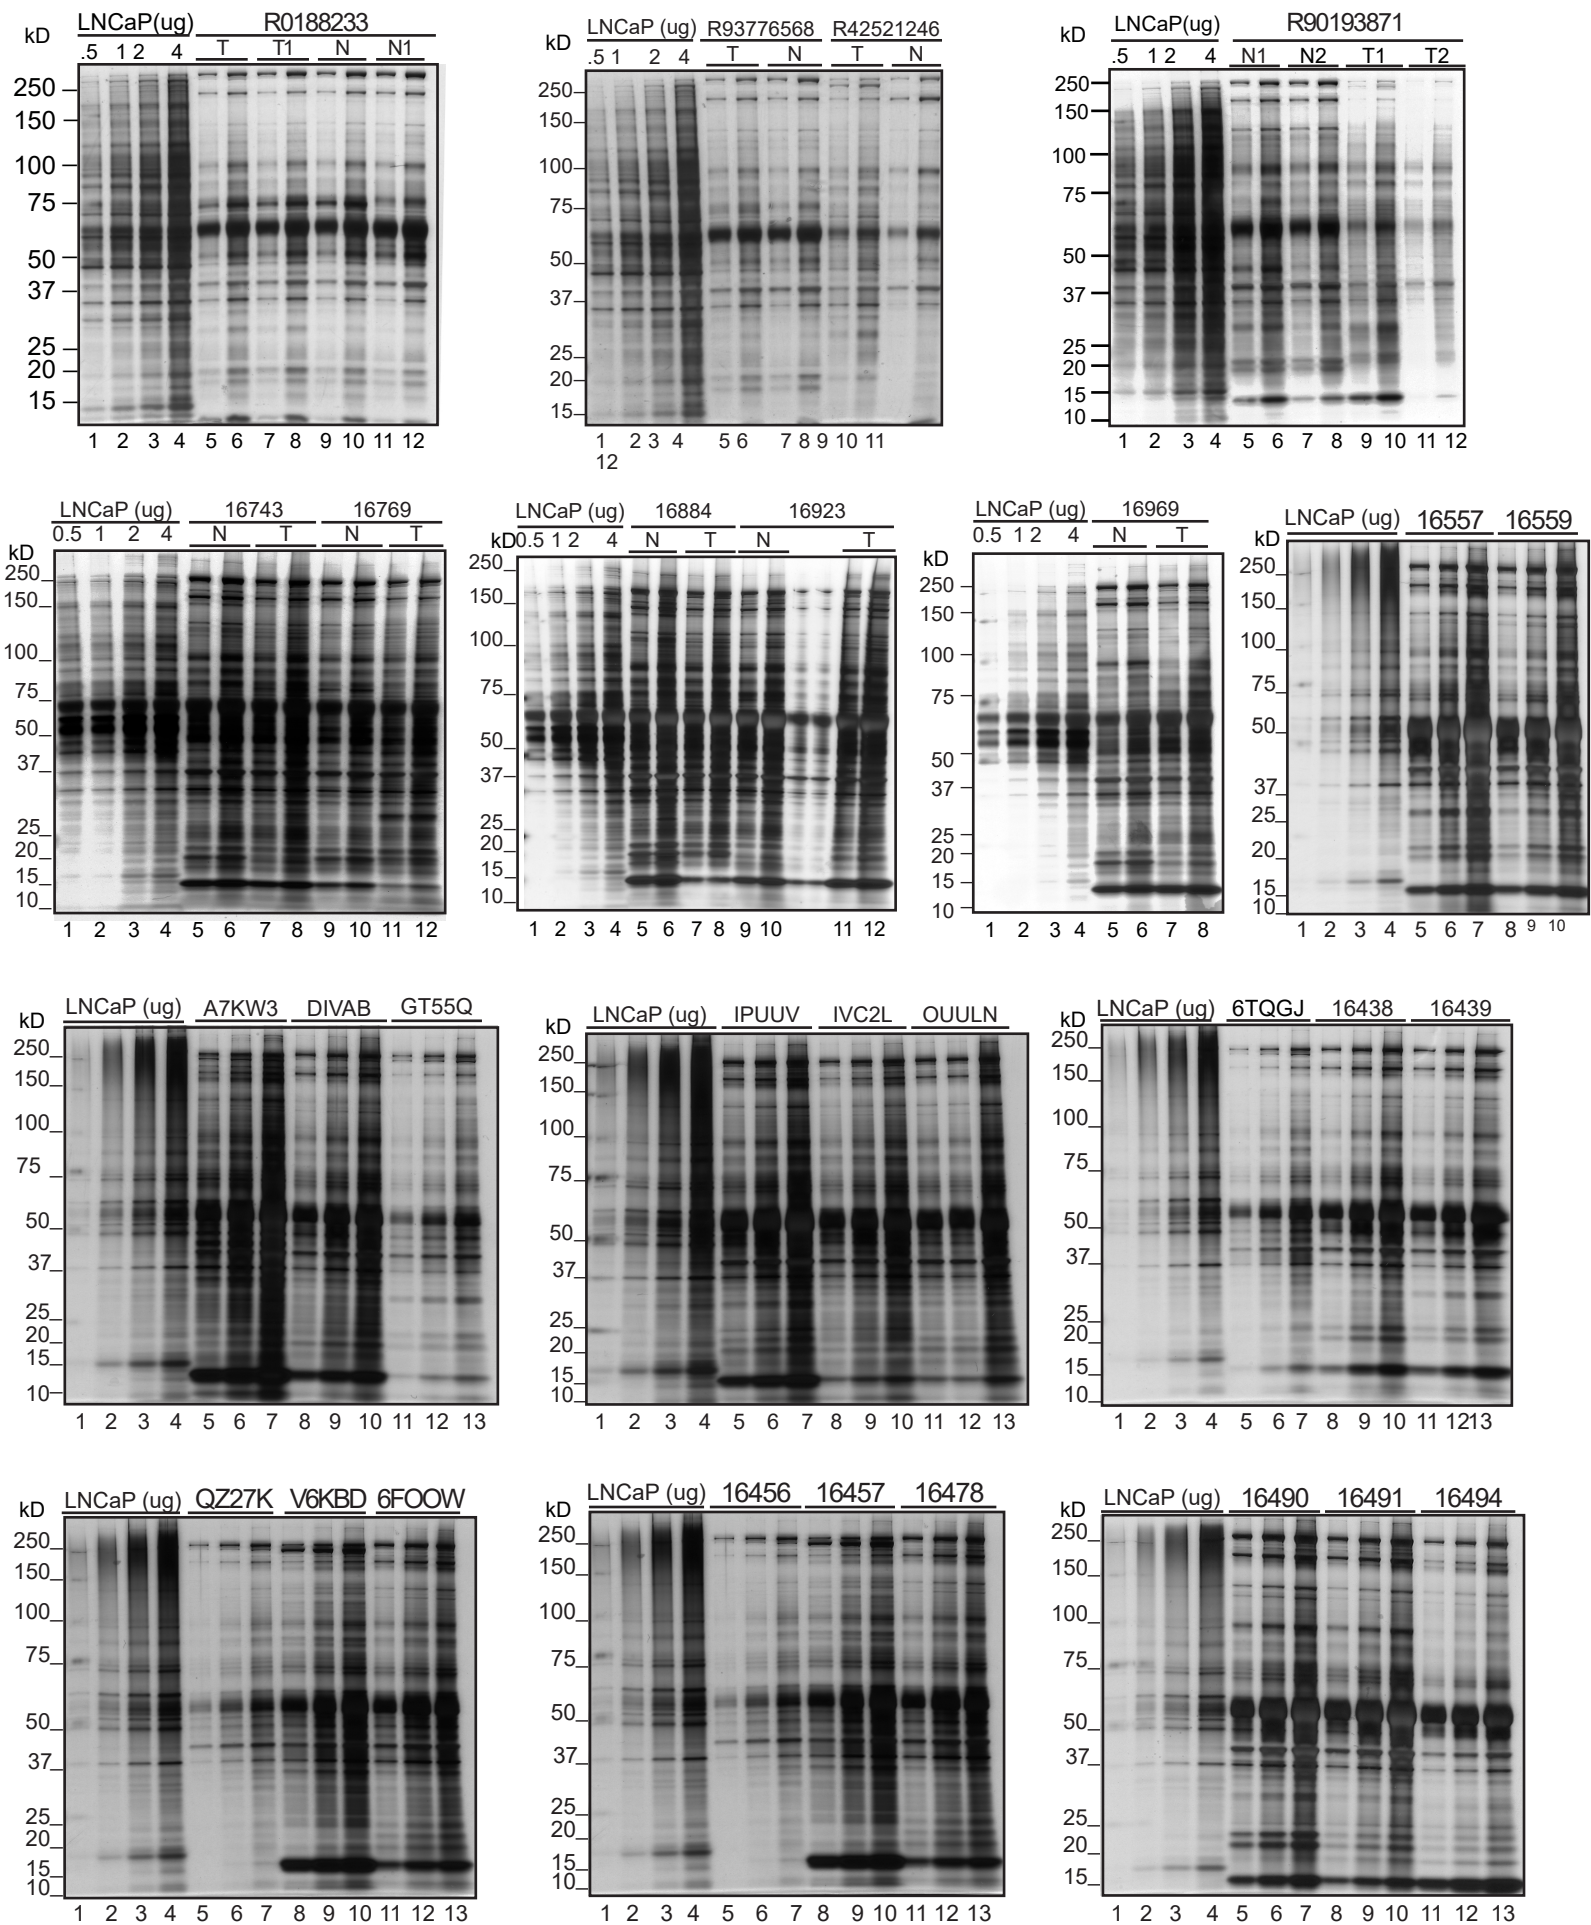

**Supplemental Fig. 8**



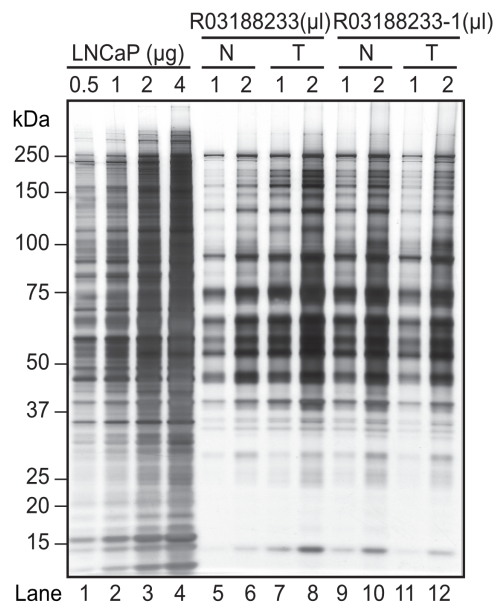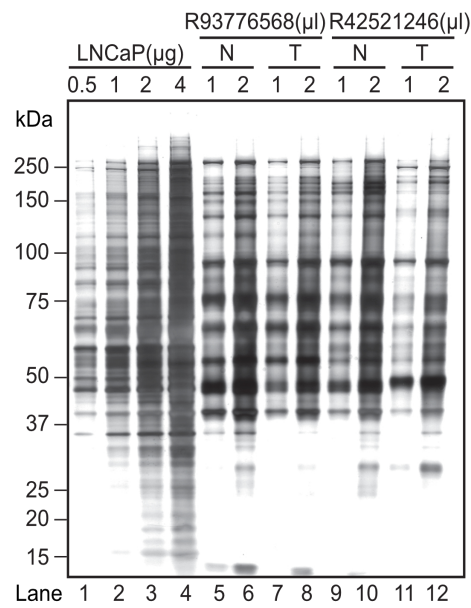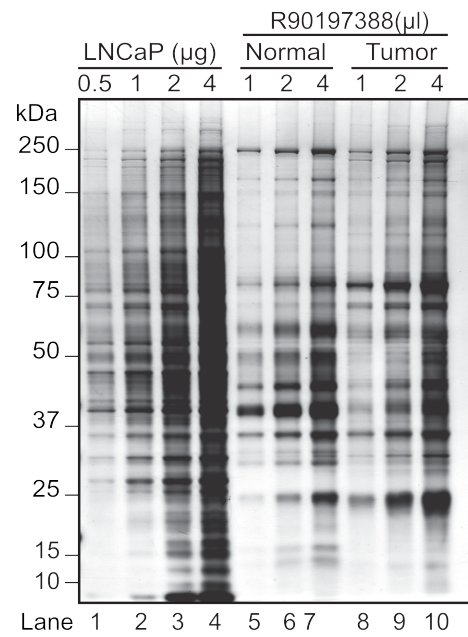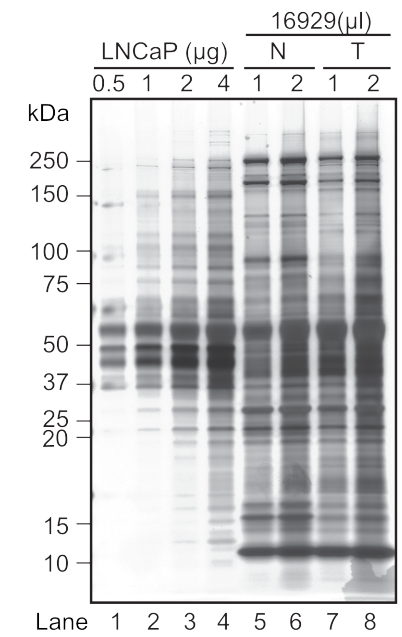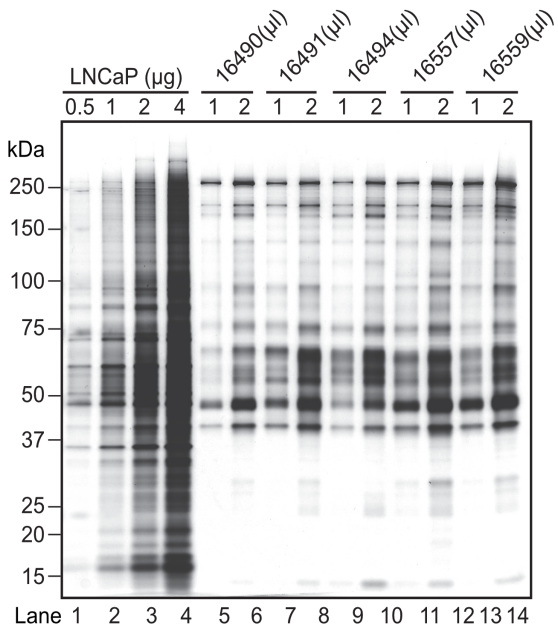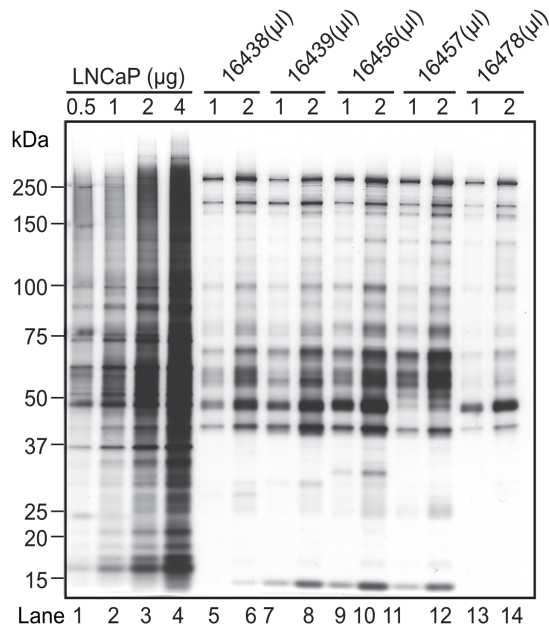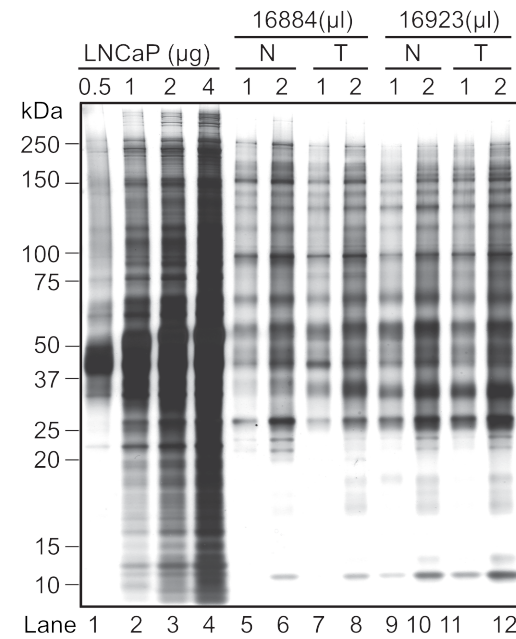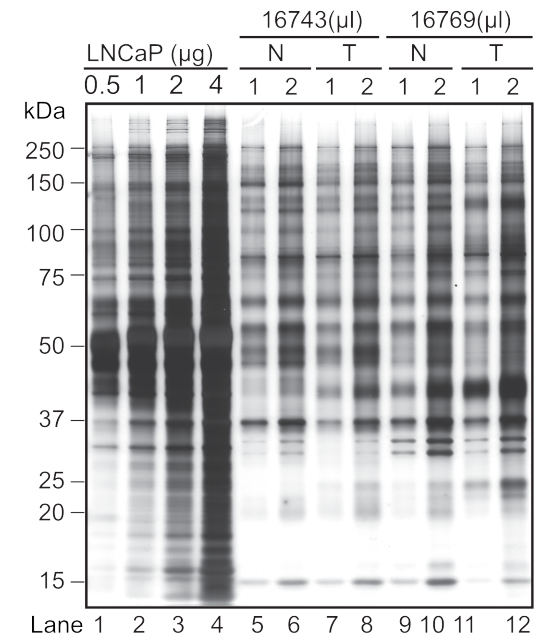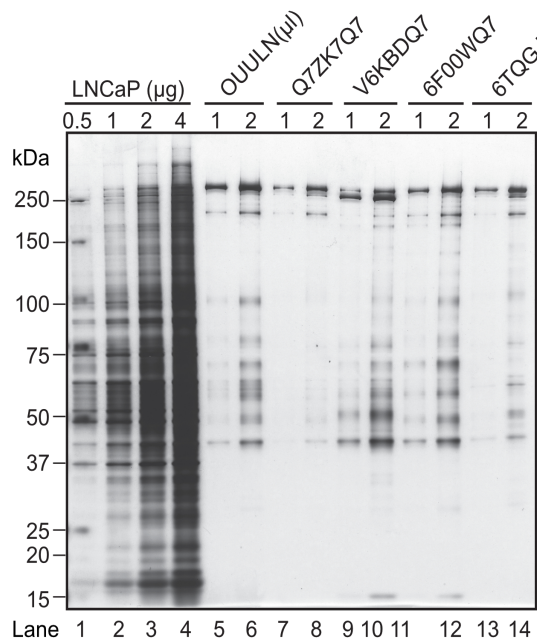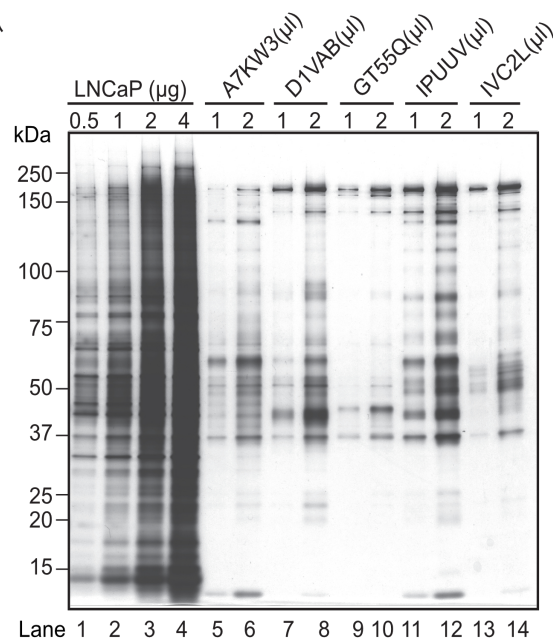

Supplemental Fig. 9

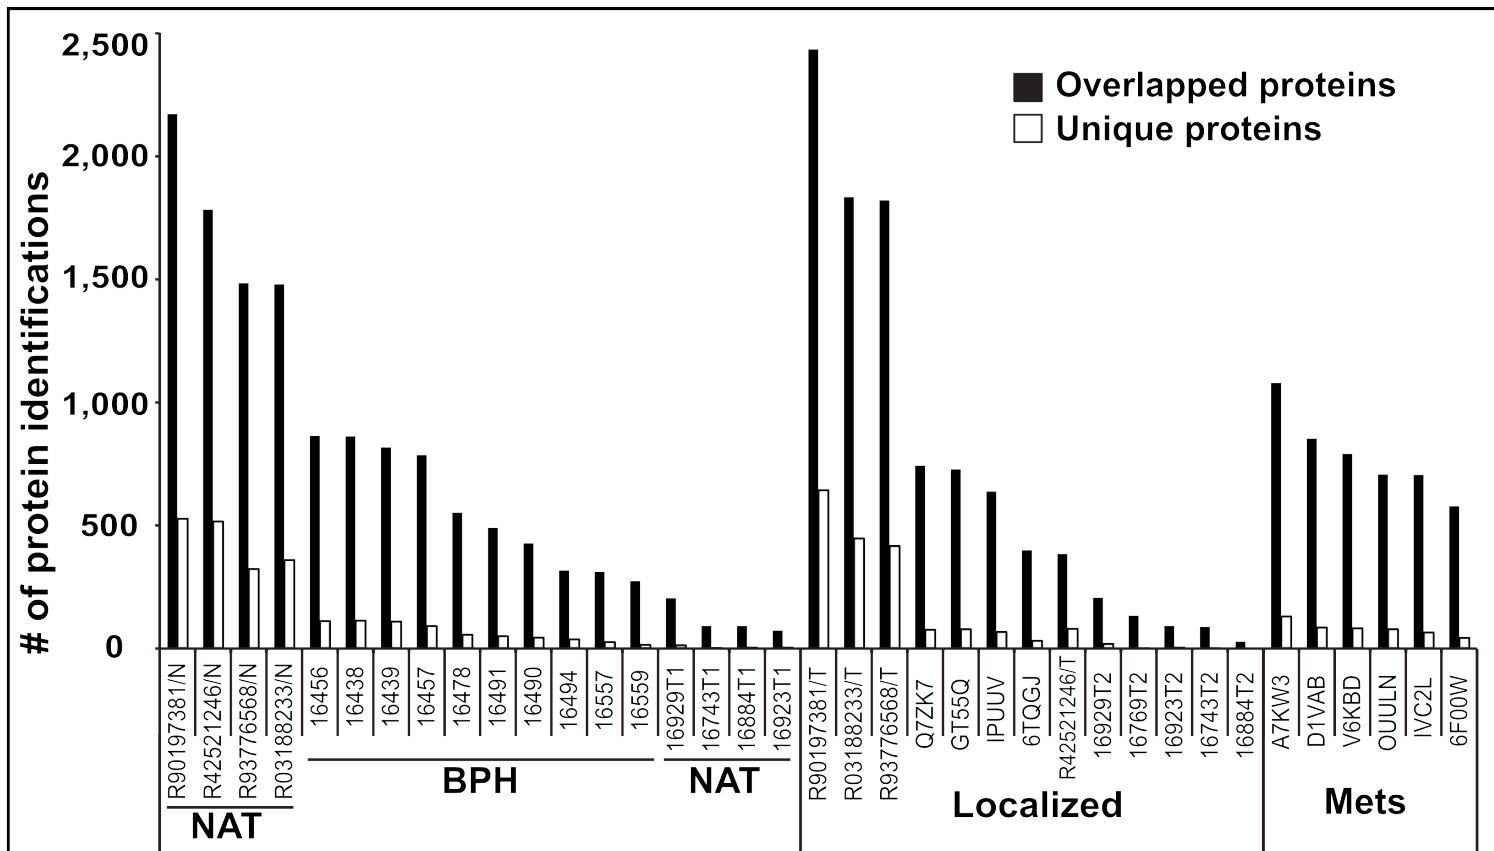

Supplemental Fig. 10

Biological replicate #2

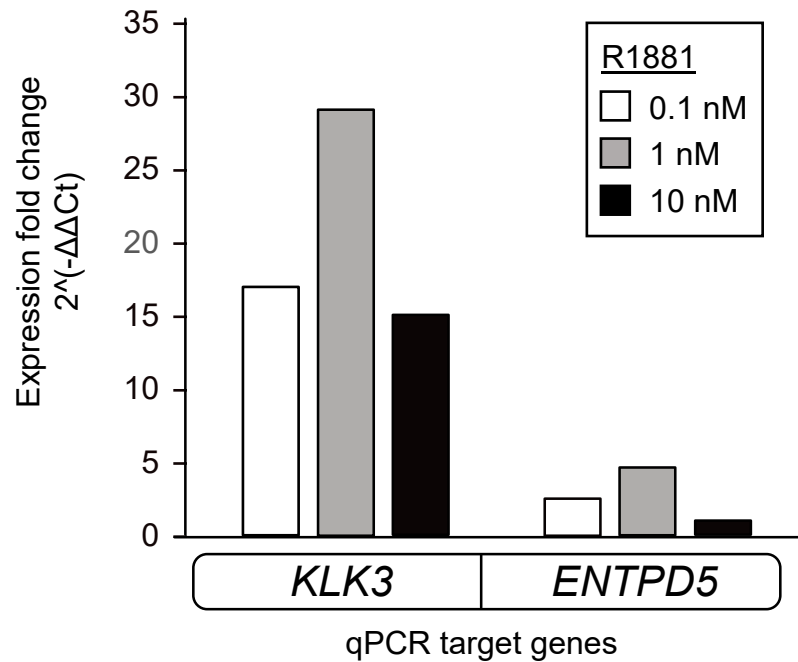

Biological replicate #3

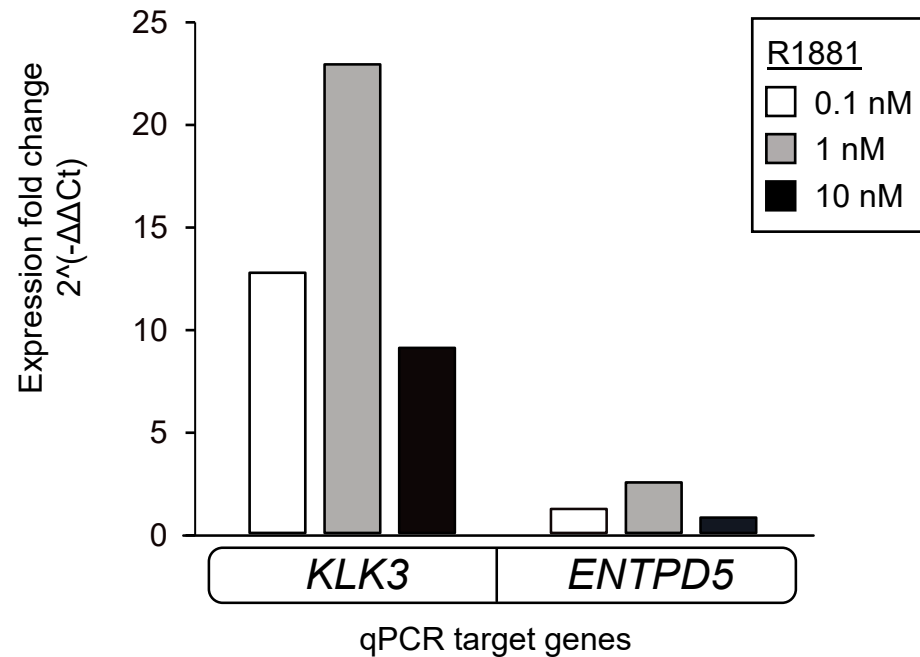

Supplemental Fig. 11

**A****chr14:74,482,139-74,482,531/ ENTPD5 Intron #2**

CTCAGGTGAT **CCTCTGAACTCAGCC**CTCTGAGT **AGCTGGA**ACTACAGGTACATGGCCACC 60  
**ACACCCAGCT**AATTTTTGTATTTTTGTAAAGACAGGGTTTT**GCCATGTTGCCAGACTG** 120  
**GTCTTGA**ACT**CCTGG**GCCTTAAGCAATCCGTCTGCCTTGGCCTCCCAAAGTGTAGGATTA 180  
CAGGCATGA**ACCACCATGACCAGCC**CAGAAATCTATCTATTTTGATACATAATAGTTCTA 240  
AATTTTATATATGGCTTGTGGACAAAATTAACATCACTTGGCAAAAACAGAGAATTAA 300  
ATTCAGGAAAAAAGAAAACCACCATTCAGGAACATTTGAAATACATTTATAAATTTAAG 360  
CTAGTGGAGATATTA 375

**chr14:74,458,755-74,459,147/ ENTPD5 Intron #6**

CCCATTT**CCAGGCCCTTCAGCT**CTAACAAAATACTTCGTATATTTGGAGTACAGATTAA 60  
GGATTCTCAATCATCTCAACTTTGTTGAGTATCTAGGGTTTATCAAATGTCTCCCTCCC 120  
CACAG 125

| Name             | Strand | Start | p-value | Sites                                              |
|------------------|--------|-------|---------|----------------------------------------------------|
| ENTPD5 Intron #2 | +      | 56    | 9.37e-8 | AGGTACATGG <b>CCACCACCCAGCT</b> AATTTTTGTA         |
| ENTPD5 Intron #2 | +      | 191   | 1.76e-7 | CAGGCATGAA <b>CCACCATGACCAGCC</b> AGAAATTTCTA      |
| ENTPD5 Intron #2 | -      | 34    | 5.42e-7 | TGGCCATGTA <b>CCTGTAGTTCAGCT</b> ACTCAGGAGG        |
| ENTPD5 Intron #6 | +      | 9     | 1.39e-6 | CCCATTT <b>C</b> <b>CCAGGCCCTTCAGCT</b> CTAACAAAAT |
| ENTPD5 Intron #2 | -      | 121   | 1.79e-6 | TTGCTTAAGC <b>CCAGGAGTTCAGAC</b> CAGTCTGGAC        |
| ENTPD5 Intron #2 | +      | 104   | 3.54e-6 | CAGGGTTTTG <b>CCATGTTGTCAGAC</b> TGGTCTTGAA        |
| ENTPD5 Intron #2 | +      | 11    | 8.53e-6 | CTCAGGTGAT <b>CCTCTGAACTCAGCC</b> TCCTGAGTAG       |

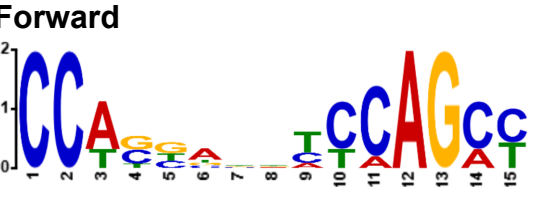**Motif: CCASBANNYCCAGCY**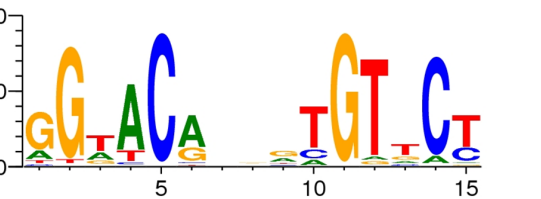**AR:M00481:GGWACRNNNTGTNCY**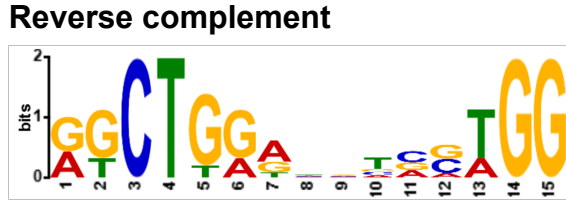**Motif: GGCTGGG**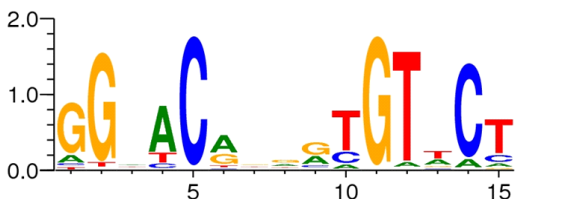**AR:M01201:GGNACRNNRTGTDCT****Supplemental Fig. 12****B**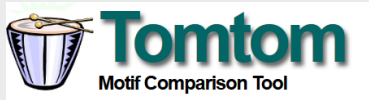

|             |                                           |
|-------------|-------------------------------------------|
| Name        | <a href="#">MA0076.2 (ELK4)</a>           |
| Database    | JASPAR2018_CORE Vertebrates Non-redundant |
| p-value     | 2.55e-03                                  |
| E-value     | 4.62e+00                                  |
| q-value     | 1.00e+00                                  |
| Overlap     | 11                                        |
| Offset      | -3                                        |
| Orientation | Normal                                    |

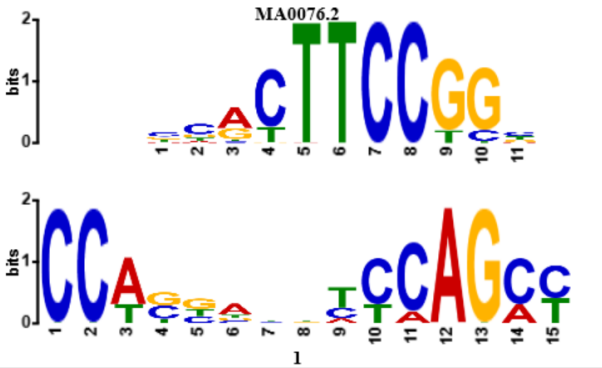

|             |                             |
|-------------|-----------------------------|
| Name        | <a href="#">ETS1_full_2</a> |
| Database    | golma2013                   |
| p-value     | 2.79e-03                    |
| E-value     | 5.05e+00                    |
| q-value     | 1.00e+00                    |
| Overlap     | 14                          |
| Offset      | 4                           |
| Orientation | Reverse Complement          |

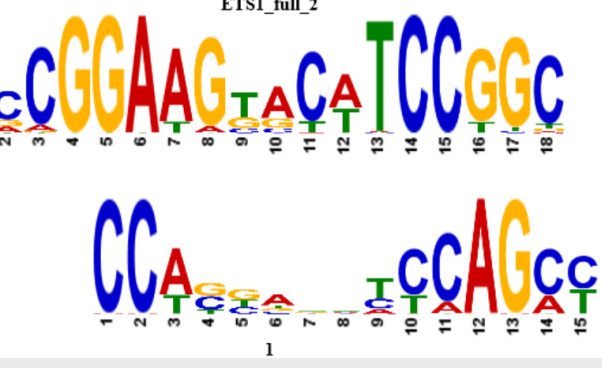

|             |                            |
|-------------|----------------------------|
| Name        | <a href="#">LBX2_DBD_1</a> |
| Database    | golma2013                  |
| p-value     | 3.29e-03                   |
| E-value     | 5.95e+00                   |
| q-value     | 1.00e+00                   |
| Overlap     | 13                         |
| Offset      | 0                          |
| Orientation | Reverse Complement         |

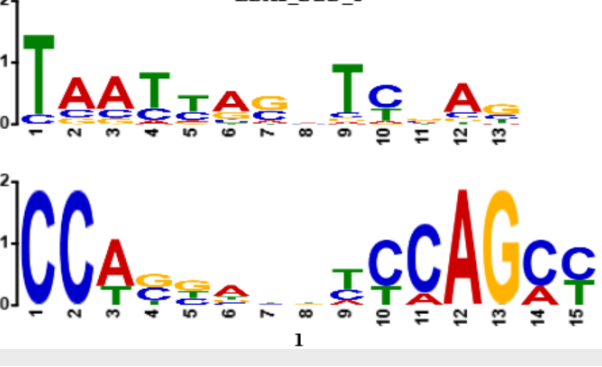

TOMTOM version 5.0.5 (Release date: Mon Mar 18 20:12:19 2019 -0700)

Reference Shobhit Gupta, JA Stamatoyannopolous, Timothy Bailey and William Stafford Noble, "Quantifying similarity between motifs", *Genome Biology*, 8(2):R24, 2007.



## Supplemental Fig. 13

Protocol for Tissue Proteomics

-Export the data from Spectrum Mill using “PPonSM” setting

-Open the file using Excel

-The data will look scrambled. To un-scramble, select the first column, “A”. Then go over to the “Data” tab on Excel, -> “Text to Columns” -> Select “Delimited” -> Next -> Check “Semicolon”-> Finish.

-Reorganize the columns so the total intensity of all the samples, accession number, and entry name are together

-End result will look something like this

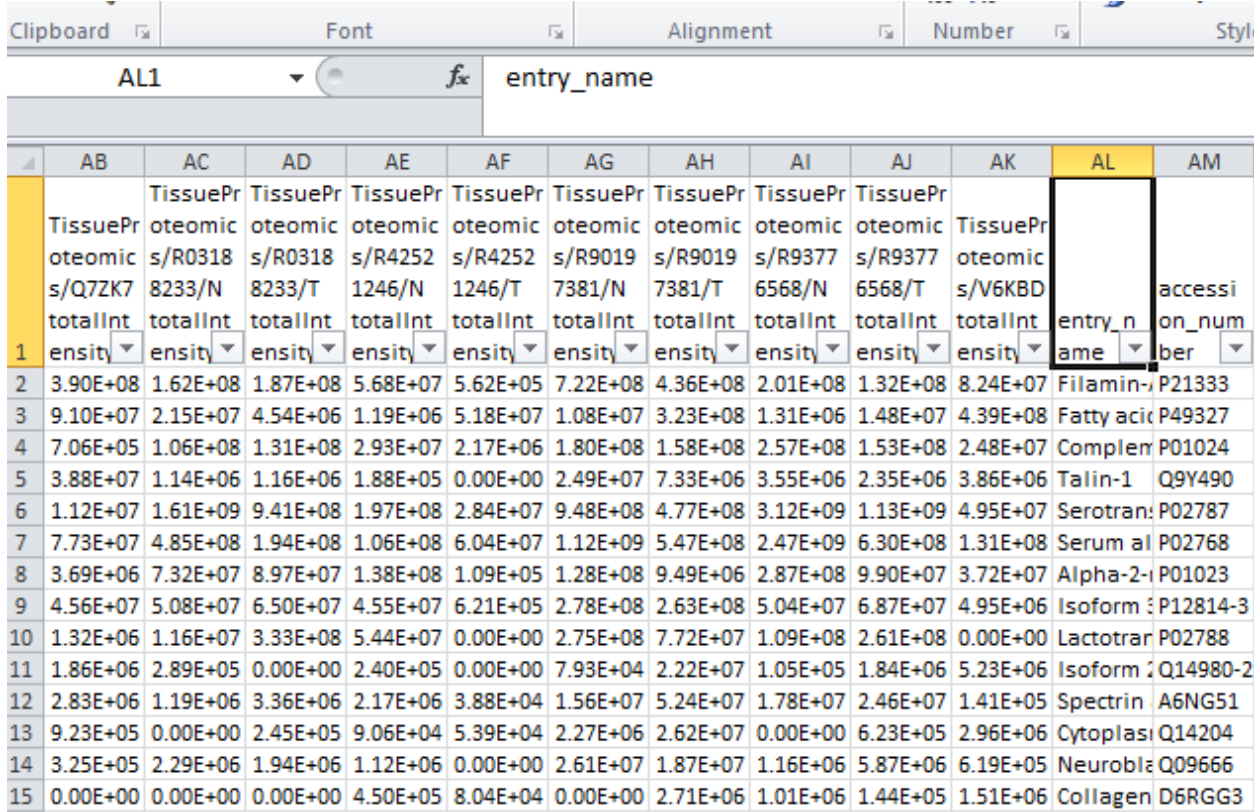

|    | AB                                                   | AC                                                             | AD                                                             | AE                                                             | AF                                                             | AG                                                             | AH                                                             | AI                                                             | AJ                                                             | AK                                                   | AL                                 | AM                       |
|----|------------------------------------------------------|----------------------------------------------------------------|----------------------------------------------------------------|----------------------------------------------------------------|----------------------------------------------------------------|----------------------------------------------------------------|----------------------------------------------------------------|----------------------------------------------------------------|----------------------------------------------------------------|------------------------------------------------------|------------------------------------|--------------------------|
| 1  | TissuePr<br>oteomic<br>s/Q7ZK7<br>totalInt<br>ensity | TissuePr<br>oteomic<br>s/R0318<br>8233/N<br>totalInt<br>ensity | TissuePr<br>oteomic<br>s/R0318<br>8233/T<br>totalInt<br>ensity | TissuePr<br>oteomic<br>s/R4252<br>1246/N<br>totalInt<br>ensity | TissuePr<br>oteomic<br>s/R4252<br>1246/T<br>totalInt<br>ensity | TissuePr<br>oteomic<br>s/R9019<br>7381/N<br>totalInt<br>ensity | TissuePr<br>oteomic<br>s/R9019<br>7381/T<br>totalInt<br>ensity | TissuePr<br>oteomic<br>s/R9377<br>6568/N<br>totalInt<br>ensity | TissuePr<br>oteomic<br>s/R9377<br>6568/T<br>totalInt<br>ensity | TissuePr<br>oteomic<br>s/V6KBD<br>totalInt<br>ensity | entry_n<br>ame                     | accessi<br>on_num<br>ber |
| 2  | 3.90E+08                                             | 1.62E+08                                                       | 1.87E+08                                                       | 5.68E+07                                                       | 5.62E+05                                                       | 7.22E+08                                                       | 4.36E+08                                                       | 2.01E+08                                                       | 1.32E+08                                                       | 8.24E+07                                             | Filamin-<br>A                      | P21333                   |
| 3  | 9.10E+07                                             | 2.15E+07                                                       | 4.54E+06                                                       | 1.19E+06                                                       | 5.18E+07                                                       | 1.08E+07                                                       | 3.23E+08                                                       | 1.31E+06                                                       | 1.48E+07                                                       | 4.39E+08                                             | Fatty acid<br>binding<br>protein 1 | P49327                   |
| 4  | 7.06E+05                                             | 1.06E+08                                                       | 1.31E+08                                                       | 2.93E+07                                                       | 2.17E+06                                                       | 1.80E+08                                                       | 1.58E+08                                                       | 2.57E+08                                                       | 1.53E+08                                                       | 2.48E+07                                             | Comple<br>x alpha-<br>2(I)         | P01024                   |
| 5  | 3.88E+07                                             | 1.14E+06                                                       | 1.16E+06                                                       | 1.88E+05                                                       | 0.00E+00                                                       | 2.49E+07                                                       | 7.33E+06                                                       | 3.55E+06                                                       | 2.35E+06                                                       | 3.86E+06                                             | Talin-1                            | Q9Y490                   |
| 6  | 1.12E+07                                             | 1.61E+09                                                       | 9.41E+08                                                       | 1.97E+08                                                       | 2.84E+07                                                       | 9.48E+08                                                       | 4.77E+08                                                       | 3.12E+09                                                       | 1.13E+09                                                       | 4.95E+07                                             | Serotran<br>sferin                 | P02787                   |
| 7  | 7.73E+07                                             | 4.85E+08                                                       | 1.94E+08                                                       | 1.06E+08                                                       | 6.04E+07                                                       | 1.12E+09                                                       | 5.47E+08                                                       | 2.47E+09                                                       | 6.30E+08                                                       | 1.31E+08                                             | Serum al<br>bumin                  | P02768                   |
| 8  | 3.69E+06                                             | 7.32E+07                                                       | 8.97E+07                                                       | 1.38E+08                                                       | 1.09E+05                                                       | 1.28E+08                                                       | 9.49E+06                                                       | 2.87E+08                                                       | 9.90E+07                                                       | 3.72E+07                                             | Alpha-2-<br>macrog<br>lobulin      | P01023                   |
| 9  | 4.56E+07                                             | 5.08E+07                                                       | 6.50E+07                                                       | 4.55E+07                                                       | 6.21E+05                                                       | 2.78E+08                                                       | 2.63E+08                                                       | 5.04E+07                                                       | 6.87E+07                                                       | 4.95E+06                                             | Isoform 3<br>of alpha-<br>2(I)     | P12814-3                 |
| 10 | 1.32E+06                                             | 1.16E+07                                                       | 3.33E+08                                                       | 5.44E+07                                                       | 0.00E+00                                                       | 2.75E+08                                                       | 7.72E+07                                                       | 1.09E+08                                                       | 2.61E+08                                                       | 0.00E+00                                             | Lactotran<br>sferin                | P02788                   |
| 11 | 1.86E+06                                             | 2.89E+05                                                       | 0.00E+00                                                       | 2.40E+05                                                       | 0.00E+00                                                       | 7.93E+04                                                       | 2.22E+07                                                       | 1.05E+05                                                       | 1.84E+06                                                       | 5.23E+06                                             | Isoform 2<br>of alpha-<br>2(I)     | Q14980-2                 |
| 12 | 2.83E+06                                             | 1.19E+06                                                       | 3.36E+06                                                       | 2.17E+06                                                       | 3.88E+04                                                       | 1.56E+07                                                       | 5.24E+07                                                       | 1.78E+07                                                       | 2.46E+07                                                       | 1.41E+05                                             | Spectrin<br>alpha-<br>1            | A6NG51                   |
| 13 | 9.23E+05                                             | 0.00E+00                                                       | 2.45E+05                                                       | 9.06E+04                                                       | 5.39E+04                                                       | 2.27E+06                                                       | 2.62E+07                                                       | 0.00E+00                                                       | 6.23E+05                                                       | 2.96E+06                                             | Cytoplas<br>mic beta-<br>tubulin   | Q14204                   |
| 14 | 3.25E+05                                             | 2.29E+06                                                       | 1.94E+06                                                       | 1.12E+06                                                       | 0.00E+00                                                       | 2.61E+07                                                       | 1.87E+07                                                       | 1.16E+06                                                       | 5.87E+06                                                       | 6.19E+05                                             | Neurobla<br>stulin                 | Q09666                   |
| 15 | 0.00E+00                                             | 0.00E+00                                                       | 0.00E+00                                                       | 4.50E+05                                                       | 8.04E+04                                                       | 0.00E+00                                                       | 2.71E+06                                                       | 1.01E+06                                                       | 1.44E+05                                                       | 1.51E+06                                             | Collagen<br>D6RGG3                 |                          |

Tip: Renaming the columns will be easier on the eyes and also later proteomics

### 1. Grabbing Gene Names

-Go the uniprot.org

-Select the “Retrieve” Tab on the top

-Select the column the contains accession numbers on your Excel file and copy them into the “Uniprot Identifiers” Box. Then click “Retrieve”

-Once completed, download and open the file in Excel

-Select the first column. On the “Home” tab in the Excel, go “conditional formatting” -> “highlight cell rules” -> “text that contains”. Type “>” in the box and then hit OK.

-Sort the column by color

Click line 1 -> "Sort & Filter"-> "Filter"

Click on the arrow box the appears. Select "Sort by colors" -> Select color of highlighted cells

End result should look like this:

|    | A                                                             | B                                                   | C               | D          | E    | F    | G | H | I | J | K | L | M |
|----|---------------------------------------------------------------|-----------------------------------------------------|-----------------|------------|------|------|---|---|---|---|---|---|---|
| 1  | >sp P133 FLNA_HUMAN                                           | Filamin-A                                           | OS=Homo sapiens | GN=FLNA    | PE=1 | SV=4 |   |   |   |   |   |   |   |
| 2  | >sp P49327 FAS_HUMAN                                          | Fatty acid synthase                                 | OS=Homo sapiens | GN=FASN    | PE=1 | SV=3 |   |   |   |   |   |   |   |
| 3  | >sp P01024 C03_HUMAN                                          | Complement C3                                       | OS=Homo sapiens | GN=C3      | PE=1 | SV=2 |   |   |   |   |   |   |   |
| 4  | >sp Q9Y490 TLN1_HUMAN                                         | Talin-1                                             | OS=Homo sapiens | GN=TLN1    | PE=1 | SV=3 |   |   |   |   |   |   |   |
| 5  | >sp P02787 TRFE_HUMAN                                         | Serotransferrin                                     | OS=Homo sapiens | GN=TF      | PE=1 | SV=3 |   |   |   |   |   |   |   |
| 6  | >sp P02768 ALBU_HUMAN                                         | Serum albumin                                       | OS=Homo sapiens | GN=ALB     | PE=1 | SV=2 |   |   |   |   |   |   |   |
| 7  | >sp P01023 A2MG_HUMAN                                         | Alpha-2-macroglobulin                               | OS=Homo sapiens | GN=A2M     | PE=1 | SV=3 |   |   |   |   |   |   |   |
| 8  | >sp P12814-3 ACTN1_HUMAN                                      | Isoform 3 of Alpha-actinin-1                        | OS=Homo sapiens | GN=ACTN1   |      |      |   |   |   |   |   |   |   |
| 9  | >sp P02788 TRFL_HUMAN                                         | Lactotransferrin                                    | OS=Homo sapiens | GN=LTF     | PE=1 | SV=6 |   |   |   |   |   |   |   |
| 10 | >sp Q14980-2 NUMA1_HUMAN                                      | Isoform 2 of Nuclear mitotic apparatus protein 1    | OS=Homo sapiens | GN=NUMA1   |      |      |   |   |   |   |   |   |   |
| 11 | >tr A6NG51 A6NG51_HUMAN                                       | Spectrin alpha chain, non-erythrocytic 1            | OS=Homo sapiens | GN=SPTAN1  | PE=2 | SV=2 |   |   |   |   |   |   |   |
| 12 | >sp Q14204 DYHC1_HUMAN                                        | Cytoplasmic dynein 1 heavy chain 1                  | OS=Homo sapiens | GN=DYNC1H1 | PE=1 | SV=5 |   |   |   |   |   |   |   |
| 13 | >sp Q09666 AHNK_HUMAN                                         | Neuroblast differentiation-associated protein AHNAK | OS=Homo sapiens | GN=AHNAK   | PE=1 | SV=2 |   |   |   |   |   |   |   |
| 14 | MSSSHSRAGQSAAGAAPGGVDTRDAEMPATEKDLAEDAPWKKIQNTFTRWCNEHLKCV    |                                                     |                 |            |      |      |   |   |   |   |   |   |   |
| 15 | SKRIANLQTDLSDGLRLIALLEVLISQKMMHRKHNRPTFRQMQLENVSVALEFLDRESIK  |                                                     |                 |            |      |      |   |   |   |   |   |   |   |
| 16 | LVSIDSKAIVDGNLKLILGLIWTLILHYSISMPMWDEEEDAEAKKQTPKQRLLGWIQNKL  |                                                     |                 |            |      |      |   |   |   |   |   |   |   |
| 17 | PQLPITNFSRDWQSGRALGALVDSCAPGLCPDWDSDWASKPVTNAREAMQQADDWLGIPQ  |                                                     |                 |            |      |      |   |   |   |   |   |   |   |
| 18 | VITPEEIVDPNVDEHSVMTYLSQFPKAKLKP                               | SAPLRPKL                                            |                 |            |      |      |   |   |   |   |   |   |   |
| 19 | RAEFTVETRSAGQGEVLVYVEDPAGHQEEAKVTANNDKNRTFSVWYVPEVTGTHKVTVLF  |                                                     |                 |            |      |      |   |   |   |   |   |   |   |
| 20 | AGQHIAKSPFEVYVDKSKQGDASKVTAQGGPLEPSGNIANKTTYFEIFTAGAGTGEVEVVI |                                                     |                 |            |      |      |   |   |   |   |   |   |   |
| 21 | QDPMGQKGTVEPQLEARGDSTYRCSYQPTMEGVHTVHVTFAGVPIPRSPYTVTVGQACNP  |                                                     |                 |            |      |      |   |   |   |   |   |   |   |
| 22 | SACRAVGRGLQPKGVVVKETADFKVYTKGAGSGELKVTVKGPKGEERVKQKDLGDGVYGF  |                                                     |                 |            |      |      |   |   |   |   |   |   |   |
| 23 | EYYPMPVPGTYIVTITWGGQNIGRSPFEVKVGTCEGNQKVRWGPGLGGVVGKSADFVVE   |                                                     |                 |            |      |      |   |   |   |   |   |   |   |
| 24 | AIGDDVGTGLGFSVEGPSQAKIECDDKGDGSCDVRYWPQEAGEYAVHVLCSNEDIRLSPFM |                                                     |                 |            |      |      |   |   |   |   |   |   |   |
| 25 | ADIRDAPQDFHPDRVKARGPGLKTVGAVNKPAAEFTVDAKHGGKAPLRVQVQDNEGCPVE  |                                                     |                 |            |      |      |   |   |   |   |   |   |   |
| 26 | ALVKDNGNGTYSCSYVPRPKVKHTAMVSWGVSIPNSPFRVNVGAGSHPNKVKVYGPVVA   |                                                     |                 |            |      |      |   |   |   |   |   |   |   |

-Select all the highlighted cell and place them in a new sheet

-Now you want to separate cells so the accession number and Gene Name ("GN") are separated.

(Delimit by "|" -> "=")

-Delete all the columns except for the accession number and gene name

End with this:



|    |          |         |  |  |
|----|----------|---------|--|--|
| 1  | P21333   | FLNA    |  |  |
| 2  | P49327   | FASN    |  |  |
| 3  | P01024   | C3      |  |  |
| 4  | Q9Y490   | TLN1    |  |  |
| 5  | P02787   | TF      |  |  |
| 6  | P02768   | ALB     |  |  |
| 7  | P01023   | A2M     |  |  |
| 8  | P12814-3 | ACTN1   |  |  |
| 9  | P02788   | LTF     |  |  |
| 10 | Q14980-2 | NUMA1   |  |  |
| 11 | A6NG51   | SPTAN1  |  |  |
| 12 | Q14204   | DYNC1H1 |  |  |
| 13 | Q09666   | AHNAK   |  |  |
| 14 |          |         |  |  |
| 15 |          |         |  |  |

-Copy both columns into your spectrum mill results

End should look like this

|    | AG        | AH        | AI        | AJ        | AK        | AL         | AM        | AN | AO       | AP      | AQ |
|----|-----------|-----------|-----------|-----------|-----------|------------|-----------|----|----------|---------|----|
| 1  | TissuePr  | TissuePr  | TissuePr  | TissuePr  |           |            |           |    |          |         |    |
| 2  | oteomics  | oteomics  | oteomics  | oteomics  | TissuePr  |            |           |    |          |         |    |
| 3  | /R901973  | /R901973  | /R937765  | /R937765  | oteomics  |            |           |    |          |         |    |
| 4  | 81/N      | 81/T      | 68/N      | 68/T      | /V6KBD    |            |           |    |          |         |    |
| 5  | totalInte | totalInte | totalInte | totalInte | totalInte | entry_na   | accession |    |          |         |    |
| 6  | nsity     | nsity     | nsity     | nsity     | nsity     | me         | _number   |    |          |         |    |
| 7  | 7.22E+08  | 4.36E+08  | 2.01E+08  | 1.32E+08  | 8.24E+07  | Filamin-A  | P21333    |    | P21333   | FLNA    |    |
| 8  | 1.08E+07  | 3.23E+08  | 1.31E+06  | 1.48E+07  | 4.39E+08  | Fatty acid | P49327    |    | P49327   | FASN    |    |
| 9  | 1.80E+08  | 1.58E+08  | 2.57E+08  | 1.53E+08  | 2.48E+07  | Complem    | P01024    |    | P01024   | C3      |    |
| 10 | 2.49E+07  | 7.33E+06  | 3.55E+06  | 2.35E+06  | 3.86E+06  | Talin-1    | Q9Y490    |    | Q9Y490   | TLN1    |    |
| 11 | 9.48E+08  | 4.77E+08  | 3.12E+09  | 1.13E+09  | 4.95E+07  | Serotrans  | P02787    |    | P02787   | TF      |    |
| 12 | 1.12E+09  | 5.47E+08  | 2.47E+09  | 6.30E+08  | 1.31E+08  | Serum alb  | P02768    |    | P02768   | ALB     |    |
| 13 | 1.28E+08  | 9.49E+06  | 2.87E+08  | 9.90E+07  | 3.72E+07  | Alpha-2-n  | P01023    |    | P01023   | A2M     |    |
| 14 | 2.78E+08  | 2.63E+08  | 5.04E+07  | 6.87E+07  | 4.95E+06  | Isoform 3  | P12814-3  |    | P12814-3 | ACTN1   |    |
| 15 | 2.75E+08  | 7.72E+07  | 1.09E+08  | 2.61E+08  | 0.00E+00  | Lactotrans | P02788    |    | P02788   | LTF     |    |
| 16 | 7.93E+04  | 2.22E+07  | 1.05E+05  | 1.84E+06  | 5.23E+06  | Isoform 2  | Q14980-2  |    | Q14980-2 | NUMA1   |    |
| 17 | 1.56E+07  | 5.24E+07  | 1.78E+07  | 2.46E+07  | 1.41E+05  | Spectrin a | A6NG51    |    | A6NG51   | SPTAN1  |    |
| 18 | 2.27E+06  | 2.62E+07  | 0.00E+00  | 6.23E+05  | 2.96E+06  | Cytoplasm  | Q14204    |    | Q14204   | DYNC1H1 |    |
| 19 | 2.61E+07  | 1.87E+07  | 1.16E+06  | 5.87E+06  | 6.19E+05  | Neuroblas  | Q09666    |    | Q09666   | AHNAK   |    |

In the ideal world, you can see the accession numbers align up exactly across, that is usually not the case if you are dealing with huge lists. To make the aligned:

-Select both accession number columns -> "Highlight cell rules"-> "Duplicate Values"

-Sort the first accession number column by color

Now they should be aligned

**Notes:**

-You will get blanks, numbers and dates

Blanks means Uniprot couldn't identify the Accession Number. The Accession number has changed or been deleted

Fix: look them up individually

Number means there wasn't a gene name associated with the Accession number

Fix: Instead of a number, replace with "NULL".

Dates show up due the excel built in properties (i.e. SEPT2 will become 9/2/2013).

Fix: Change cell type to "Text" on the "Home" tab, then manually type the gene in again.

**Cutoff**

-Select the expression columns and highlight cells that have values <100,000.

-All values that are highlighted, replace the values with "0"

**Normalization**

Values were based on their BSA and by how much starting protein.

**Clustering**

-Go to <http://genepattern.broadinstitute.org/gp/pages/index.jsf>

-Cluster -> Hierarchical Clustering\

-Used the following settings:

## Hierarchical Clustering

\* required field

Reset

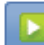**input filename\***

Upload File...

Add Path or URL...

drop files here

input data file name - .gct, .res, .pcl

**column distance measure\***

No column clustering

distance measure for column (sample) clustering

**row distance measure\***

Pearson correlation

distance measure for row (gene) clustering NOTE: Filtering beforehand is recommended since row clustering is computationally intensive.

**clustering method\***

Pairwise complete-linkage

hierarchical clustering method to use

**log transform**

no

log-transform the data before clustering

**row center**

no

whether to center each row (gene) in the data

**row normalize**

no

whether to normalize each row (gene) in the data

**column center**

no

whether to center each column (sample) in the data

**column normalize**

no

whether to normalize each column (sample) in the data

**output base name\***

&lt;inputfilename\_basename&gt;

base name for output files

Reset

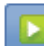

-To set up the file for clustering, use the following image as a guide:

Required (Version)      # of columns      Sample

|    | A        | B          | C        | D        | E        | F        | G        | H        | I        |
|----|----------|------------|----------|----------|----------|----------|----------|----------|----------|
| 1  | #1.2     |            |          |          |          |          |          |          |          |
| 2  | 9288     | 37         |          |          |          |          |          |          |          |
| 3  | GID      | NAME       | 16438    | 16439    | 16456    | 16457    | 16478    | 16490    | 16491    |
| 4  | P21333   | FLNA Filar | 8.46E+06 | 8.46E+06 | 8.46E+06 | 8.46E+06 | 8.46E+06 | 8.46E+06 | 8.46E+06 |
| 5  | P15309-2 | ACPP Isof  | 8.46E+06 | 8.46E+06 | 8.46E+06 | 8.46E+06 | 8.46E+06 | 8.46E+06 | 8.46E+06 |
| 6  | P02768   | ALB Serun  | 8.46E+06 | 8.46E+06 | 8.46E+06 | 8.46E+06 | 8.46E+06 | 8.46E+06 | 8.46E+06 |
| 7  | P02787   | TF Serotra | 8.46E+06 | 8.46E+06 | 8.46E+06 | 8.46E+06 | 8.46E+06 | 8.46E+06 | 8.46E+06 |
| 8  | P12277   | CKB Creat  | 8.46E+06 | 8.46E+06 | 8.46E+06 | 8.46E+06 | 8.46E+06 | 8.46E+06 | 8.46E+06 |
| 9  | P68871   | HBB Hemc   | 8.46E+06 | 8.46E+06 | 8.46E+06 | 8.46E+06 | 8.46E+06 | 8.46E+06 | 8.46E+06 |
| 10 | P02763   | ORM1 Alp   | 8.46E+06 | 8.46E+06 | 8.46E+06 | 8.46E+06 | 8.46E+06 | 8.46E+06 | 8.46E+06 |
| 11 | P07288   | KLK3 Pros  | 8.46E+06 | 8.46E+06 | 8.46E+06 | 8.46E+06 | 8.46E+06 | 8.46E+06 | 8.46E+06 |
| 12 | P01009   | SERPINA1   | 8.46E+06 | 8.46E+06 | 8.46E+06 | 8.46E+06 | 8.46E+06 | 8.46E+06 | 8.46E+06 |
| 13 | P05787   | KRT8 Kera  | 8.46E+06 | 6.36E+06 | 8.46E+06 | 8.46E+06 | 8.46E+06 | 7.12E+06 | 8.46E+06 |
| 14 | P02790   | HPX Hemc   | 8.46E+06 | 8.46E+06 | 8.46E+06 | 8.46E+06 | 8.46E+06 | 8.46E+06 | 8.46E+06 |
| 15 | P01834   | IGKC Ig ka | 8.46E+06 | 8.46E+06 | 8.46E+06 | 8.46E+06 | 8.46E+06 | 8.46E+06 | 8.46E+06 |
| 16 | P69905   | HBA1 Hem   | 8.46E+06 | 8.46E+06 | 8.46E+06 | 8.46E+06 | 8.46E+06 | 8.46E+06 | 8.46E+06 |
| 17 | P49327   | FASN Fatt  | 7.97E+06 | 8.46E+06 | 8.46E+06 | 3.80E+05 | 6.73E+06 | 0.00E+00 | 1.38E+06 |
| 18 | P07237   | P4HB Prot  | 8.46E+06 | 2.64E+06 | 8.46E+06 | 2.87E+06 | 8.46E+06 | 8.46E+06 | 8.46E+06 |

# of row of IDs

-GID contains the accession numbers

-NAME contains the gene name and the description

-To save: File->"Save As" -> File name: "example.gct"(must be exactly like this) -> Save as type: "Text (Tab delimited)" -> "Save"

-Here is an example:

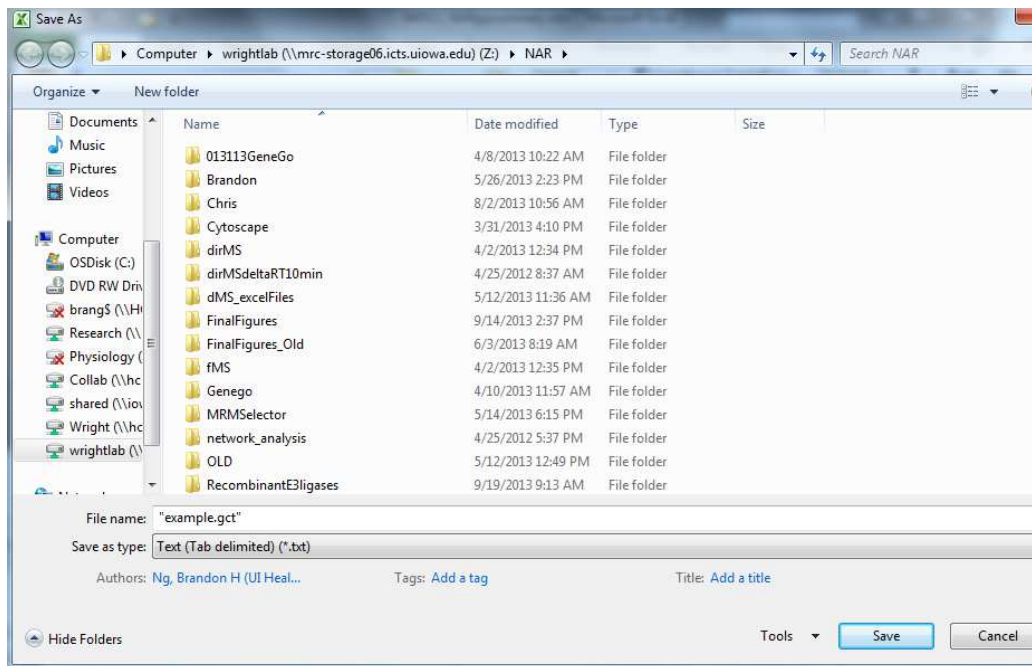

Note: The file name cannot have symbols or uppercase letters

Samples that had the same amount of starting material were placed in the same cluster (i.e. 100, 50, <20)

**Supplemental Figure 1A. Androgen-mediated proliferation of LNCaP prostate-tumor cells is dose-dependent.** Tissue-culture plates (96-well) were seeded with LNCaP cells in androgen-depleted (AD) growth medium (phenol-red deficient RPMI1640 containing 10% charcoal-stripped serum) for 24 hrs and challenged with vehicle (EtOH; 0 nM R1881) and different concentrations of synthetic androgen R1881 (*i.e.*, 0.1, 1, or 10 nM). The relative fluorescence units (RFUs) of vehicle- and androgen-treated LNCaP cells were determined at 48 hrs (*i.e.*, day 2), 96 hrs (*i.e.*, day 4), and 144 hrs (*i.e.*, day 6) after the challenge, using AD growth medium with the CyQUANT Cell Proliferation Assay Kit. The mean and standard deviation RFU values for each experimental condition (12 wells per condition, *i.e.* 12 biological replicates) and timepoint were plotted for a single independent experiment. The colored lines (*i.e.*, brown, 0 nM; purple, 0.1 nM; green, 1.0 nM; red, 10.0 nM R1881) connect the mean values for each condition at 48, 96, and 144 hrs.

**Supplemental Figure 1B. Androgen-mediated proliferation of LNCaP prostate-tumor cells is dose-dependent.** Tissue-culture plates (96-well) were seeded with LNCaP cells in androgen-depleted (AD) growth medium (phenol-red deficient RPMI1640 containing 10% charcoal-stripped serum) for 24 hrs and challenged with vehicle (EtOH; 0 nM R1881) and different concentrations of synthetic androgen R1881 (*i.e.*, 0.1, 1, or 10 nM). The relative fluorescence units (RFUs) of vehicle- and androgen-treated LNCaP cells were determined at 48 hrs (*i.e.*, day 2), 96 hrs (*i.e.*, day 4), and 144 hrs (*i.e.*, day 6) after the challenge, using AD growth medium with the CyQUANT Cell Proliferation Assay Kit. The mean and standard deviation RFU values for each experimental condition (12 wells per condition, *i.e.*, 12 biological replicates) and timepoint were plotted for a single independent experiment. The colored lines (*i.e.*, brown, 0 nM; purple, 0.1 nM; green, 1.0 nM; red, 10.0 nM R1881) connect the mean values for each condition at 48, 96, and 144 hrs.

**Supplemental Figure 2. Uncropped western blot analyses of proteins extracted from LNCaP cells shown in Figures 1 and 5.** Red boxes denote cropped regions of the scanned western blots using Adobe Photoshop version CS6 software.

**Supplemental Figure 3. Network visualization of enriched pathways in androgen-responsive glycoproteins in LNCaP cells.** Protein interaction networks were built in Cytoscape, with ontology and annotation information downloaded through the Cytoscape interface. Plots for 0 nM, 0.1 nM, 1.0 nM, and 10.0 nM R1881 are shown. Detailed descriptions of the steps used in the processing and filtering of data are provided in the supplemental methods section below.

**Supplemental Figure 4. Dose-dependent theoretical clusters.** K-means clustering of 27 theoretical cluster graphs of androgen-regulated glycoproteins in LNCaP cells.

**Supplemental Figure 5. K Means Clustering of lectin-enriched proteins in LNCaP prostate tumor cells.** The 27 protein clusters generated using the K Means Clustering algorithm. Protein abundance values for 0, 0.1, 1.0, and 10.0 nM R1881 samples were uploaded into RStudio.

**Supplemental Figure 6. Theoretical clusters associated with 10 nM R1881 growth-inhibition.** Concordant and discordant theoretical cluster graphs associated with 10 nM growth-inhibition.

**Supplemental Figure 7. Hematoxylin and eosin visualization of clinical samples.** H&E images of normal adjacent tissue (NAT), benign prostate hyperplasia (BPH), localized prostate cancers (CaP), and metastatic prostate cancers (mPCa) as visualized under a light microscope at 10X. Slides contained vendor ID numbers for Proteogenex, University of Iowa Tissue Core, and BioServices. Other

sample identifiers included age of patient, tissue type, tissue weight, Gleason score, PSA level, cancer stage, and percent tumorous tissue, if available.

**Supplemental Figure 8. Silver stain analyses of proteins extracted from clinical tissues.** For samples R01388233–16969 were loaded in even numbered lanes with each sample loaded with 1  $\mu$ l, whereas odd numbered lanes were loaded with 2  $\mu$ l of sample. For all other samples, 1  $\mu$ l of sample was loaded in lanes 5, 8, and 11, 2  $\mu$ l of sample was loaded in lanes 6, 9, and 12; and 4  $\mu$ l of sample was loaded for lanes 7, 10, and 13. LNCaP whole-cell lysate were used as a control and were loaded according to the following amounts: well 1 = 0.5  $\mu$ g, well 2 = 1  $\mu$ g, well 3 = 2  $\mu$ g, and well 4 = 4  $\mu$ g. The final protein concentration of each sample was estimated by comparing the staining intensity of silver stained gels loaded with control lysates, using the NIH ImageJ software program.

**Supplemental Figure 9. Silver stain analysis of lectin-enriched glycoproteins from clinical prostate tissues.** Control lysates (LNCaP total protein) were loaded according to the following quantities: well 1 = 0.5  $\mu$ g, well 2 = 1  $\mu$ g, well 3 = 2  $\mu$ g, and well 4 = 4  $\mu$ g. Odd-numbered sample lanes were loaded with 1  $\mu$ l whereas even-numbered lanes were loaded with 2  $\mu$ l. The final protein concentration for each sample was estimated by comparing the staining intensity of silver stained gels loaded with control lysates, using the NIH ImageJ software program.

**Supplemental Figure 10. Protein identifications in clinical prostate tissues.** Summary of non-redundant protein IDs in NAT, BPH, localized PCa, and metastatic PCa tissue samples as determined by directed MS (dMS) analyses on the Agilent 6520 Accurate-Mass Quadrupole Time-of-Flight (Q-TOF) mass spectrometer. The number of shared and unique protein IDs for each tissue sample are shown.

**Supplement Figure 11. Androgen-regulated expression of ENTPD5 in LNCaP prostate tumor cells.** LNCaP cells grown for 72 hrs in AD growth medium were exposed to vehicle (i.e., EtOH) or the synthetic androgen R1881 at 0.1, 1, and 10 nM for 24 hrs. Total RNA was extracted from vehicle and androgen-treated cells using the RNeasy Midi Kit. First-strand cDNA synthesis was performed with the SuperScript® III First-Strand Synthesis kit, and real-time quantitative PCR was performed with the SYBR Green PCR Master Mix, using qPCR primers directed to GAPDH, AR, and ENTPD5. Normalized Ct values in experimentally-treated samples at .1, 1, and 10 nM R1881 were determined based upon GAPDH, KLK3, and ENTPD5 gene expression values in vehicle-treated samples using the Ct method.

**Supplemental Figure 12. Characterization of androgen receptor ChIP-Seq peaks at ENTPD5 in LNCaP cells.** (A) The ChIP-Seq file (GSM353644\_jy10s123.allregions.txt.gz) from Yu *et al.* was uploaded into Integrated Genome Viewer (IGV) and ChIP-seq signals for ENTPD5 (ranging from 0-150 maximum) counts from the ChIP-Seq experiment were visualized. ChIP signals for ENTPD5 were detected at intron #2 (chr14:74,482,139- 74,482,531) and intron #6 (chr14:74,458,755- 74,459,147). A consensus motif CCASBANNYCCAGCY was detected in introns #2 and #6. The reverse complement motif shows weak conservation to AR motifs M00481: GGWACRNNNTGTNCY and M01201: GGNACRNNRTGTDCT annotated at MotifMap<sup>1,2</sup>. (B) The TomTom motif comparison tool was used to compare the consensus motif CCASBANNYCCAGCY to known DNA transcription factor motifs. Three motifs that have significant overlap with the consensus motif CCASBANNYCCAGCY were identified. This included an ELK4 motif (MA0076.2), an ETS1 full motif, and an LBX2\_DBD\_1 motif.

**Supplemental Figure 13. Steps involved in the hierarchical clustering of glycoproteins in LNCaP cells and clinical prostate tissue samples.** A detailed description of how the glycoproteomic datasets were uploaded and analyzed with the GenePattern software program hosted at the Broad Institute, Boston MA<sup>3</sup>.

## SUPPLEMENTAL METHODS SECTION:

**K means clustering of lectin-enriched glycoproteins in LNCaP cells:** The 27 theoretical protein clusters were obtained by excluding any protein/row that had a 0 value for the measured abundance. All abundance values of the remaining 717 proteins/rows were normalized. The normalization was performed on every protein by dividing each of the 4 abundance values (*i.e.* 0 nM, 0.1 nM, 1.0 nM, and 10 nM R1881) by their total sum. The normalized values were exported from Excel in a tab-delimited text file with five columns and header row: accession, 0 nM, 0.1 nM, 1 nM and 10 nM. The file was loaded into RStudio using the command `dataArray <- read.table("ghd-data.txt", row.names=1, header=TRUE, sep="\t")` and the resulting variable name "dataArray", as stored input normalized data. The command `"row.names=1"` told the program that the first column of protein names were row names and the command `"header=TRUE"` told the program that the file had column headers. The command `sep="\t"` specified tabs as the delimiter. Once the data were loaded, K means clustering was executed for 27 clusters using the command: `dataCluster <- kmeans(dataArray, 27, nstart=20)`. This stored the clustered results into the variable `dataCluster`, and the last `"nstart=20"` specifies trying 20 random starting assignments and choosing the one with the lowest within cluster variation. Clustered data was written out to a results file using the following commands: `outputClusters <- dataCluster$cluster` `write.csv(outputClusters, file="clusters.csv")`. The "clusters.csv" file contains two columns; the first is the protein accession number and the second is the cluster value as an integer. The output was imported back into Excel, the appropriate cluster was pasted into the spreadsheet (using the VLOOKUP command), the normalized data were sorted by clusters, and each cluster was plotted separately.

**Discovery of DNA motifs in ENTPD5 intron 2 and 6:** (Supplemental Figure 10A)-The MEME program was used to identify DNA sequence motifs on ChIP-seq peaks at the *ENTPD5* locus. ChIP-seq signals present in the GEO sample accession: GSM35364 (*i.e.*, GSM353644\_jy10s123.allregions.txt.gz), which contained enriched DNA signals bound by the AR in R1881-treated LNCaP cells, was retrieved from human reference genome (hg19/GRCh37) with Integrated Genomics Viewer (IGV) program. A ChIP signal maximum threshold was selected for 150 counts to highlight ChIP signals in ENTPD5 intron 2, which encompassed 375 base pairs, and ENTPD5 intron 6, which encompassed 125 base pairs, were used for MEME analyses<sup>4</sup>. The Fasta formatted DNA sequences were uploaded into MEME and searched against motifs of Human DNA using the HOCOMOCO Human (v11 CORE) database. The 15-base pair CCASBANNYCCAGCY motif was the longest and most frequently detected (seven sites) consensus motif in introns #2 and #6 of *ENTPD5*.

**Tomtom motif comparison of CCASBANNYCCAGCY motif in ENTPD5:** The 15-bp CCASBANNYCCAGCY motif was searched against motifs of Human DNA using the HOCOMOCO Human (v11 CORE) database using the Tomtom Motif Comparison Tool program<sup>5</sup>. Motifs showing significant overlap with CCASBANNYCCAGCY were detected and displayed in the output (Supplemental Figure 10B).

**Protocol for network visualization of lectin-enriched proteome in LNCaP cells:** Proteins identified in vehicle- and androgen-treated samples were uploaded into Cytoscape 3.1<sup>6</sup>. Protein interaction networks were built in Cytoscape, with ontology and annotation information downloaded through the Cytoscape interface using the PINA4MS 2.0 plugin<sup>7</sup>. The enriched network output was then annotated and organized within the software platform to visualize the results. The enriched networks were color-coded, with the larger nodes indicating higher statistically significant enrichment value and smaller nodes indicating smaller statistically significant enrichment value. The  $-\log(p\text{-value})$  statistical significance ranged from 0 to 5.



**Protocol for Cytoscape visualization of STRING protein-protein interaction graphs:** (Figure 2C)- The list of genes from the 10 nM growth-inhibited clusters (Figure 2B) (Supplemental Excel file 3) were analyzed in the Cytoscape version 3.7.1 software program and subjected to STRING protein query analysis using the Human species database with a confidence score of .4. The output protein-protein interactions were visualized with the perfuse force directed layout and manipulated so that edges could be observed between PPIs. All PPI graphs shown in Figure 2C contained PPI enrichment scores < 0.05, demonstrating that PPI graphs contained more protein interactions between the group of proteins than would be expected from a random set of proteins of similar size drawn from the human genome<sup>6</sup>.

**Protocol for WebGestalt overrepresentation enrichment analysis (ORA) of 10 nM growth-inhibition clusters:** (Figure 2C)- The list of genes from the 10 nM growth-inhibited clusters (Figure 2B) (Supplement Excel X) were uploaded into the WebGestalt software program and analyzed for ORA<sup>8,9</sup>. The settings included Homo sapiens as the organism of interest, geneontology for functional database, and genome encoding-protein as the reference gene list. PPI graphs were constructed in Cytoscape for growth-inhibition clusters with FDR and P values ≤ 0. Only clusters 2, 5, 7, 22, and 26 passed this threshold and PPI graphs displayed in Figure 2C.

## **References:**

- 1 Xie, X., Rigor, P. & Baldi, P. MotifMap: a human genome-wide map of candidate regulatory motif sites. *Bioinformatics* **25**, 167-174, doi:10.1093/bioinformatics/btn605 (2008).
- 2 Daily, K., Patel, V. R., Rigor, P., Xie, X. & Baldi, P. MotifMap: integrative genome-wide maps of regulatory motif sites for model species. *BMC Bioinformatics* **12**, 495, doi:10.1186/1471-2105-12-495 (2011).
- 3 Reich, M. *et al.* GenePattern 2.0. *Nature Genetics* **38**, 500-501, doi:10.1038/ng0506-500 (2006).
- 4 Bailey, T. L. & Elkan, C. Fitting a mixture model by expectation maximization to discover motifs in biopolymers. Report No. CONF-9408117-; Other: CNN: Grant HG00005; TRN: 96:005197-0004 United States Other: CNN: Grant HG00005; TRN: 96:005197-0004 American Association for Artificial Intelligence, 445 Burgess Drive, Menlo Park, CA 94025 (United States) OSTI English, Medium: X; Size: pp. 28-36 (; Stanford Univ., CA (United States), 1994).
- 5 Gupta, S., Stamatoyannopoulos, J. A., Bailey, T. L. & Noble, W. S. Quantifying similarity between motifs. *Genome Biology* **8**, R24, doi:10.1186/gb-2007-8-2-r24 (2007).
- 6 Shannon, P. *et al.* Cytoscape: A Software Environment for Integrated Models of Biomolecular Interaction Networks. *Genome Res.* **13**, 2498-2504 (2003).
- 7 Cowley, M. J. *et al.* PINA v2.0: mining interactome modules. *Nucleic Acids Research* **40**, D862-D865, doi:10.1093/nar/gkr967 (2011).
- 8 Zhang, B., Kirov, S. & Snoddy, J. WebGestalt: an integrated system for exploring gene sets in various biological contexts. *Nucleic Acids Res* **33**, W741-W748, doi:10.1093/nar/gki475 (2005).
- 9 Wang, J., Duncan, D., Shi, Z. & Zhang, B. WEB-based GENE SeT AnaLysis Toolkit (WebGestalt): update 2013. *Nucleic Acids Res* **41**, W77-83, doi:10.1093/nar/gkt439 (2013).

**Supplemental Table I: Mass Spectrometry Statistics**

| R1881 (nM)                                              | 0      | 0.1    | 1      | 10     |
|---------------------------------------------------------|--------|--------|--------|--------|
| Number of LC-MS/MS runs                                 | 9      | 9      | 9      | 9      |
| Total MS/MS spectra                                     | 63,728 | 61,346 | 63,128 | 64,277 |
| Number of distinct peptides                             | 5,499  | 5,393  | 5,046  | 5,461  |
| Number of distinct proteins<br>(FDR < 1%, SpectrumMill) | 1,540  | 1,558  | 1,668  | 1,586  |

## Supplemental Table II: Clinical Features of Tissue Samples

| <b>Summary of Clinical Samples</b> |                    |                |
|------------------------------------|--------------------|----------------|
| <b>Characteristic</b>              | <b># out of 37</b> | <b>% total</b> |
| <i>NAT/BPH</i>                     | 18                 | 49             |
| <i>Localized T2</i>                | 13                 | 35             |
| <i>Mets</i>                        | 6                  | 16             |
| <b>Non-cancerous Samples</b>       |                    |                |
| <b>Characteristic</b>              | <b># out of 18</b> | <b>% total</b> |
| <i>NAT</i>                         | 8                  | 44             |
| <i>BPH</i>                         | 10                 | 56             |
| <b>Cancerous Samples</b>           |                    |                |
| <b>Characteristic</b>              | <b># out of 19</b> | <b>% total</b> |
| <i>Gleason 6</i>                   | 3                  | 16             |
| <i>Gleason 7</i>                   | 11                 | 58             |
| <i>Gleason 9</i>                   | 3                  | 16             |
| <i>Gleason 10</i>                  | 1                  | 5              |
| <i>N/A</i>                         | 1                  | 5              |
| <i>Stage II</i>                    | 8                  | 42             |
| <i>Stage III</i>                   | 8                  | 42             |

## Supplemental Table III: Clinical features of tissue samples

| Normal Adjacent Tissue (NAT) and Benign Prostate Hyperplasia (BPH) Samples |            |             |       |               |              |         |                        |                |
|----------------------------------------------------------------------------|------------|-------------|-------|---------------|--------------|---------|------------------------|----------------|
| No.                                                                        | Sample ID  | Patient Age | PSA   | Gleason Score | Cancer Stage | % Tumor | Sample                 | Vendor         |
| 1                                                                          | 16456T1(1) | 61          | N/A   | —             | —            | —       | BPH                    | ProteoGenex    |
| 2                                                                          | 16457T1(2) | 67          | N/A   | —             | —            | —       | BPH                    | ProteoGenex    |
| 3                                                                          | 16478B1(2) | 61          | N/A   | —             | —            | —       | BPH                    | ProteoGenex    |
| 4                                                                          | 16490T1(4) | 60          | N/A   | —             | —            | —       | BPH                    | ProteoGenex    |
| 5                                                                          | 16491T1(6) | 61          | N/A   | —             | —            | —       | BPH                    | ProteoGenex    |
| 6                                                                          | 16494T1(2) | 65          | N/A   | —             | —            | —       | BPH                    | ProteoGenex    |
| 7                                                                          | 16557T1(2) | 60          | N/A   | —             | —            | —       | BPH                    | ProteoGenex    |
| 8                                                                          | 16559T1(2) | 66          | N/A   | —             | —            | —       | BPH                    | ProteoGenex    |
| 9                                                                          | 16438T1(2) | 66          | N/A   | —             | —            | —       | BPH                    | ProteoGenex    |
| 10                                                                         | 16439T1(2) | 60          | N/A   | —             | —            | —       | BPH                    | ProteoGenex    |
| 11                                                                         | 16743T1    | 62          | N/A   | —             | —            | —       | NAT                    | ProteoGenex    |
| 12                                                                         | 16769T1    | 60          | N/A   | —             | —            | —       | NAT                    | ProteoGenex    |
| 13                                                                         | 16884T1    | 61          | N/A   | —             | —            | —       | NAT                    | ProteoGenex    |
| 14                                                                         | 16923T1    | 65          | N/A   | —             | —            | —       | NAT                    | ProteoGenex    |
| 15                                                                         | 16929T1    | 54          | N/A   | —             | —            | —       | NAT                    | ProteoGenex    |
| Localized Cancer Samples                                                   |            |             |       |               |              |         |                        |                |
| No.                                                                        | Sample ID  | Patient Age | PSA   | Gleason Score | Cancer Stage | % Tumor | Sample type            | Vendor         |
| 16                                                                         | 16743T2    | 62          | N/A   | 3+4=7         | STAGE III    | 60      | T2 -                   | ProteoGenex    |
| 17                                                                         | 16769T2    | 60          | N/A   | 3+3=6         | STAGE III    | 70      | T2 -                   | ProteoGenex    |
| 18                                                                         | 16884T2    | 61          | N/A   | 3+4=7         | STAGE II     | 100     | T2 -                   | ProteoGenex    |
| 19                                                                         | 16923T2    | 65          | N/A   | 4=3=7         | STAGE III    | 100     | T2 -                   | ProteoGenex    |
| 20                                                                         | 16929T2    | 54          | N/A   | 3=4=7         | STAGE III    | 75      | T2 -                   | ProteoGenex    |
| 21                                                                         | R90197381  | 61          | 7.77  | 5+5=10        | N/A          | N/A     | T2 -                   | UI Tissue Core |
| 22                                                                         | 6TQGJ      | 71          | N/A   | 4+3=7         | STAGE II     | 80      | T2 -                   | BioServe       |
| 23                                                                         | GT55Q      | 66          | N/A   | 3+3=6         | STAGE II     | 80      | T2 -                   | BioServe       |
| 24                                                                         | IPUUV      | 63          | N/A   | 3+4=7         | STAGE II     | 55      | T2 -                   | BioServe       |
| 25                                                                         | Q7ZK7      | 69          | N/A   | 3+4=7         | STAGE II     | 80      | T2 -                   | BioServe       |
| 26                                                                         | R03188233  | N/A         | 5.9   | 3+4=7         | N/A          | N/A     | T2 -                   | UI Tissue Core |
| 27                                                                         | R42521246  | 70          | 37.43 | 4+5=9         | N/A          | 15      | T2 -                   | UI Tissue Core |
| 28                                                                         | R67820304  | 51          | 7.18  | 4+3=7         | N/A          | N/A     | T2 -                   | UI Tissue Core |
| 29                                                                         | R93776568  | N/A         | 4.08  | 3+4=7         | N/A          | N/A     | T2 -<br>Localized      | UI Tissue Core |
| Metastatic Cancer Samples                                                  |            |             |       |               |              |         |                        |                |
| No.                                                                        | Sample ID  | Patient Age | PSA   | Gleason Score | Cancer Stage | % Tumor | Sample                 | Vendor         |
| 30                                                                         | 6FOOW      | 61          | N/A   | 4+3=7         | STAGE III    | 55      | Met (Colon)            | BioServe       |
| 31                                                                         | IVC2L      | 72          | N/A   | 3+3=6         | STAGE III    | 65      | Local Met              | BioServe       |
| 32                                                                         | V6KBD      | 71          | N/A   | 5+4=9         | STAGE III    | 90      | Local Met              | BioServe       |
| 33                                                                         | OUULN      | 60          | N/A   | 3+4=7         | STAGE IV     | 50      | Met (Bladder,<br>Neck) | BioServe       |
| 34                                                                         | A7KW3      | 82          | N/A   | N/A           | NA           | 95      | Met (Brain)            | BioServe       |
| 35                                                                         | D1VAB      | 62          | N/A   | 4+5=9         | STAGE IV     | 80      | Met (Lymph<br>Node)    | BioServe       |

The yellow highlighted tissue samples 16769T1 and R67820304 were lost during sample processing and excluded from the glycoproteomic analyses.

# Supplemental Table IV: Protein quantification of Normal Adjacent Tissue & Benign Prostate Hyperplasia

| Sample ID   | Sample Weight | Weight Used | Extract Concent. | Buffer Used | Total Protein | Glyco-enrichment | Post-dialysis | Total Protein | Protein Retention | Amount used for proteomics |
|-------------|---------------|-------------|------------------|-------------|---------------|------------------|---------------|---------------|-------------------|----------------------------|
| 16743T1c2   | 0.83 g        | 0.83 g      | 3 ug/ul          | 10 ml       | 30 mg         | 11.5 mg          | .59 ug/ul     | 1416 ug       | 12.30%            | 50 ug                      |
| 16769T1c1   | 0.68 g        | 0.68 g      | 1.5 ug/ul        | 8 ml        | 12 mg         | 11.5 mg          | .89 ug/ul     | 1958 ug       | 17%               | 50 ug                      |
| 16884T1c1   | 0.44 g        | 0.44 g      | 3 ug/ul          | 5 ml        | 15 mg         | 11.5 mg          | .79 ug/ul     | 1817 ug       | 15.80%            | 50 ug                      |
| 16923T1c1   | 0.44 g        | 0.44 g      | 3 ug/ul          | 5 ml        | 15 mg         | 11.5 mg          | .84 ug/ul     | 1848 ug       | 16.10%            | 50 ug                      |
| 16929T1c1   | 0.79 g        | 0.79 g      | 3 ug/ul          | 10 ml       | 30 mg         | 11.5 mg          | .33 ug/ul     | 726 ug        | 6.30%             | 50 ug                      |
| 16438T1c2   | 0.56 g        | 0.56 g      | 1.5 ug/ul        | 8 ml        | 12 mg         | 10 mg            | 0.5 ug/ul     | 1000 ug       | 10%               | 100 ug                     |
| 16439T1c2   | 0.511 g       | 0.511 g     | 2 ug/ul          | 8 ml        | 16 mg         | 10 mg            | 0.6 ug/ul     | 1200 ug       | 12%               | 100 ug                     |
| 16456T1c1   | 0.809 g       | 0.809 g     | 3 ug/ul          | 8 ml        | 24 mg         | 10 mg            | 0.7 ug/ul     | 1400 ug       | 14%               | 100 ug                     |
| 16457T1c2   | 0.819 g       | 0.819 g     | 2.5 ug/ul        | 8 ml        | 20 mg         | 10 mg            | 0.7 ug/ul     | 1400 ug       | 14%               | 100 ug                     |
| 16478B1c2   | 0.723 g       | 0.723 g     | 1.5 ug/ul        | 8 ml        | 12 mg         | 10 mg            | 0.5 ug/ul     | 1000 ug       | 10%               | 100 ug                     |
| 16490T1c4   | 0.793 g       | 0.793 g     | 4 ug/ul          | 8 ml        | 32 mg         | 10 mg            | 0.5 ug/ul     | 1000 ug       | 10%               | 100 ug                     |
| 16791T1c6   | 0.606 g       | 0.606 g     | 3.5 ug/ul        | 8 ml        | 28 mg         | 10 mg            | 0.6 ug/ul     | 1200 ug       | 12%               | 100 ug                     |
| 16494T1(2)c | 0.602 g       | 0.602 g     | 2.5 ug/ul        | 8 ml        | 20 mg         | 10 mg            | 0.55 ug/ul    | 1100 ug       | 11%               | 100 ug                     |
| 16557T1c2   | 0.0851 g      | 0.0851 g    | 4 ug/ul          | 8 ml        | 32 mg         | 10 mg            | 0.75 ug/ul    | 1500 ug       | 15%               | 100 ug                     |
| 16559T1c(2) | 0.656 g       | 0.656 g     | 3.5 ug/ul        | 8 ml        | 28 mg         | 10 mg            | 0.85 ug/ul    | 1700 ug       | 17%               | 100 ug                     |
| R03188233N  | NK            | 2.92 g      | 0.375 ug/ul      | 4 ml        | 1500 ug       | 800 ug           | 0.375 ug/ul   | 70 ug         | 8.75%             | 20 ug                      |
| R42521246N  | 59 g          | 1.59 g      | 0.25 ug/ul       | 2 ml        | 500 ug        | 400 ug           | 0.5 ug/ul     | 25 ug         | 6.25%             | 10 ug                      |
| R67820304N  | 44.65 g       | 1.55 g      | 3 ug/ul          | 2 ml        | 6000 ug       | 400 ug           | 0.0125 ug/ul  | 10 ug         | 2.50%             | 8 ug                       |
| R90197381N  | 45.6 g        | 1.53 g      | 0.5 ug/ul        | 1 ml        | 500 ug        | 400 ug           | 0.25 ug/ul    | 30 ug         | 7.50%             | 20 ug                      |
| R93776568N  | 39.55 g       | 2.28 g      | 0.375 ug/ul      | 3 ml        | 1125 ug       | 400 ug           | 0.75 ug/ul    | 60 ug         | 15%               | 20 ug                      |

## Localized

| Sample ID  | Sample Weight | Weight Used | Extract Concent. | Buffer Used | Total Protein | Glyco-enrichment | Post-dialysis | Total Protein | Protein Retention | Amount used for proteomics |
|------------|---------------|-------------|------------------|-------------|---------------|------------------|---------------|---------------|-------------------|----------------------------|
| 16884T2c2  | 0.40 g        | 0.40 g      | 3 ug/ul          | 5 ml        | 15 mg         | 11.5 mg          | .68 ug/ul     | 1632 ug       | 14.20%            | 50 ug                      |
| GT55Q      | 0.075g        | 0.075 g     | 1 ug/ul          | 5 ml        | 5 mg          | 2 mg             | 0.15 ug/ul    | 450 ug        | 22.50%            | 100 ug                     |
| IPUUV      | 0.468g        | 0.468 g     | 2 ug/ul          | 8 ml        | 16 mg         | 8 mg             | 0.5 ug/ul     | 1000 ug       | 12.50%            | 100 ug                     |
| 6TQGJ      | 0.116 g       | 0.116 g     | 1 ug/ul          | 5 ml        | 5 mg          | 5 mg             | 0.2 ug/ul     | 500 ug        | 10%               | 100 ug                     |
| Q7ZK7      | 0.076 g       | 0.076 g     | 0.6 ug/ul        | 5 ml        | 3 mg          | 2 mg             | 0.15 ug/ul    | 375 ug        | 18.80%            | 100 ug                     |
| R03188233T | NK            | 2.91 g      | 0.375 ug/ul      | 4 ml        | 1500 ug       | 800 ug           | 0.5 ug/ul     | 90 ug         | 11.25%            | 20 ug                      |
| R42521246T | 59 g          | 3.08 g      | 0.5 ug/ul        | 4 ml        | 2000 ug       | 400 ug           | 0.5 ug/ul     | 35 ug         | 8.75%             | 10 ug                      |
| R67820304T | 44.65 g       | 1.57 g      | 1.5 ug/ul        | 2 ml        | 3000 ug       | 400 ug           | 0.025 ug/ul   | 23.5 ug       | 5.90%             | 8 ug                       |
| 16743T2c2  | 0.82 g        | 0.82 g      | 3 ug/ul          | 10 ml       | 30 mg         | 11.5 mg          | .67 ug/ul     | 1407 ug       | 12.20%            | 50 ug                      |
| 16769T2c1  | 0.87 g        | 0.87 g      | 1.5 ug/ul        | 10 ml       | 15 mg         | 11.5 mg          | .92 ug/ul     | 2024 ug       | 17.60%            | 50 ug                      |
| 16923T2c1  | 0.43 g        | 0.43 g      | 3 ug/ul          | 5 ml        | 15 mg         | 11.5 mg          | 1.11 ug/ul    | 2442 ug       | 21.20%            | 50 ug                      |
| 16929T2c1  | 0.52g         | 0.52 g      | 3 ug/ul          | 5 ml        | 15 mg         | 11.5 mg          | 1.06 ug/ul    | 2332 ug       | 20.30%            | 50 ug                      |
| R90197381T | 45.6 g        | 1.53 g      | 0.225 ug/ul      | 1 ml        | 225 ug        | 400 ug           | 0.5 ug/ul     | 40 ug         | 10%               | 20 ug                      |
| R93776568T | 39.55 g       | 2.29 g      | 0.375ug/ul       | 3 ml        | 1125 ug       | 400 ug           | 0.5 ug/ul     | 60 ug         | 15%               | 20 ug                      |

## Metastatic

| Sample ID | Sample Weight | Weight Used | Extract Concent. | Buffer Used | Total Protein | Glyco-enrichment | Post-dialysis | Total Protein | Protein Retention | Amount used for proteomics |
|-----------|---------------|-------------|------------------|-------------|---------------|------------------|---------------|---------------|-------------------|----------------------------|
| 6FOOW     | 0.308 g       | 0.308 g     | 3 ug/ul          | 5 ml        | 15 mg         | 10 mg            | 0.3 ug/ul     | 600 ug        | 6%                | 100 ug                     |
| A7KW3     | 0.804 g       | 0.804 g     | 4.5 ug/ul        | 8 ml        | 36 mg         | 10 mg            | 0.3 ug/ul     | 600 ug        | 6%                | 100 ug                     |
| D1VAB     | 0.359 g       | 0.359 g     | 2.5 ug/ul        | 5 ml        | 12.5 mg       | 10 mg            | 0.4 ug/ul     | 800 ug        | 8%                | 100 ug                     |

|       |         |         |         |      |       |       |            |        |        |        |
|-------|---------|---------|---------|------|-------|-------|------------|--------|--------|--------|
| IVC2L | 0.129 g | 0.129 g | 2 ug/ul | 5 ml | 10 mg | 8 mg  | 0.2 ug/ul  | 500 ug | 6.25%  | 100 ug |
| OUULN | 0.25 g  | 0.25 g  | 2 ug/ul | 5 ml | 10 mg | 8 mg  | 0.35 ug/ul | 875 ug | 10.90% | 100 ug |
| V6KBD | 0.198 g | 0.198 g | 3 ug/ul | 5 ml | 15 mg | 10 mg | 0.25 ug/ul | 625 ug | 6.25%  | 100 ug |

Supplemental Table Legend: Proteins used and retained during processing. Column 1 details the total amount of protein extracted from the tissue samples. Column 2 explains the amount of protein used for glycoprotein enrichment. Columns 3 and 4 list concentrations after dialysis and the approximate total amount of protein recovered, respectively. Retained protein (target glycoproteins of interest) is shown in the second to last column. The final column details the amount of protein digested and further process for mass spec analysis.
